# Supplementary material for: Solvent induced cooperativity of Zn(ii) complexes cleaving a phosphatediester RNA analog in methanol
Source: Royal Society of Chemistry journal article supplement (doi:10.1039/c1ob06482g), 2011-11-25
Supplement: c1ob06482g.pdf [file c1ob06482g.pdf]

# Solvent Induced Cooperativity of Zn(II) Complexes Cleaving a Phosphate Diester RNA Analog in Methanol.

**Mark F. Mohamed, Irma Sanchez-Lombardo, Alexei A. Neverov, and R. Stan Brown\***

Department of Chemistry, Queen's University, 90 Bader Lane, Kingston, Ontario, Canada, K7L 3N6

<sup>1</sup>H NMR Spectrum of ligand **4** (Bis(2-pyridylmethyl)benzylamine)

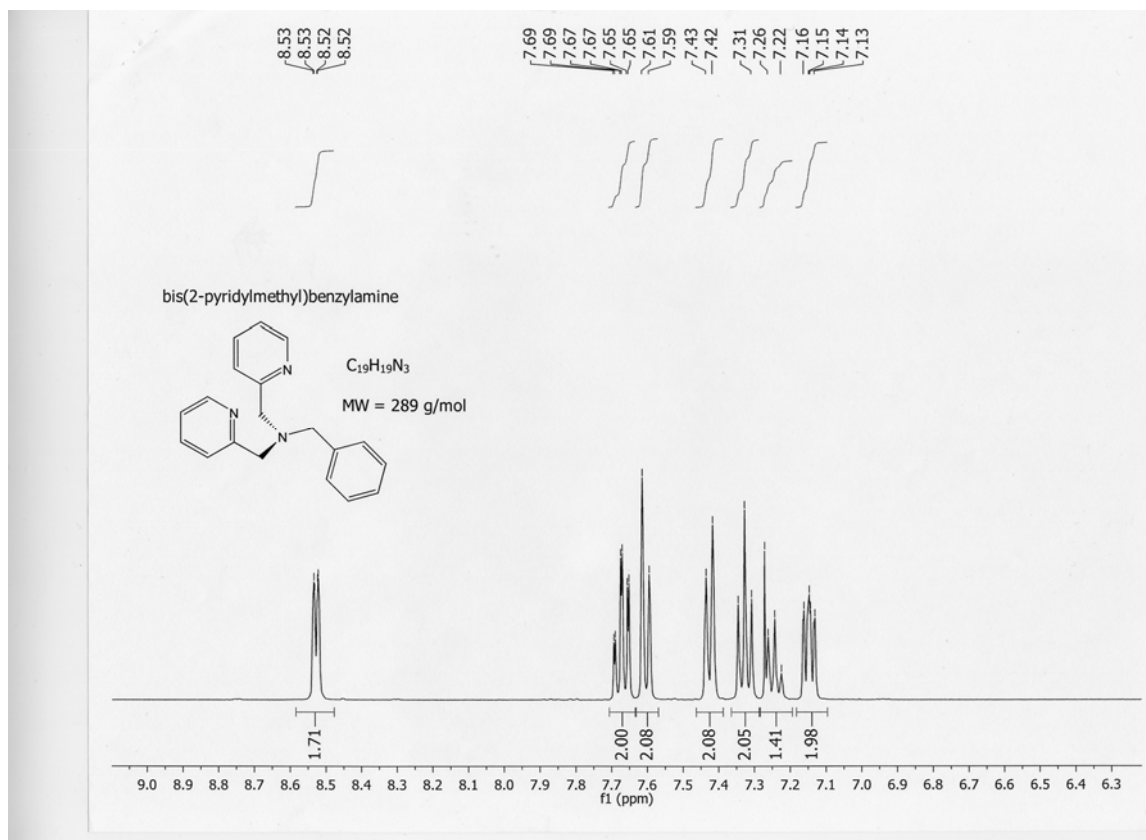

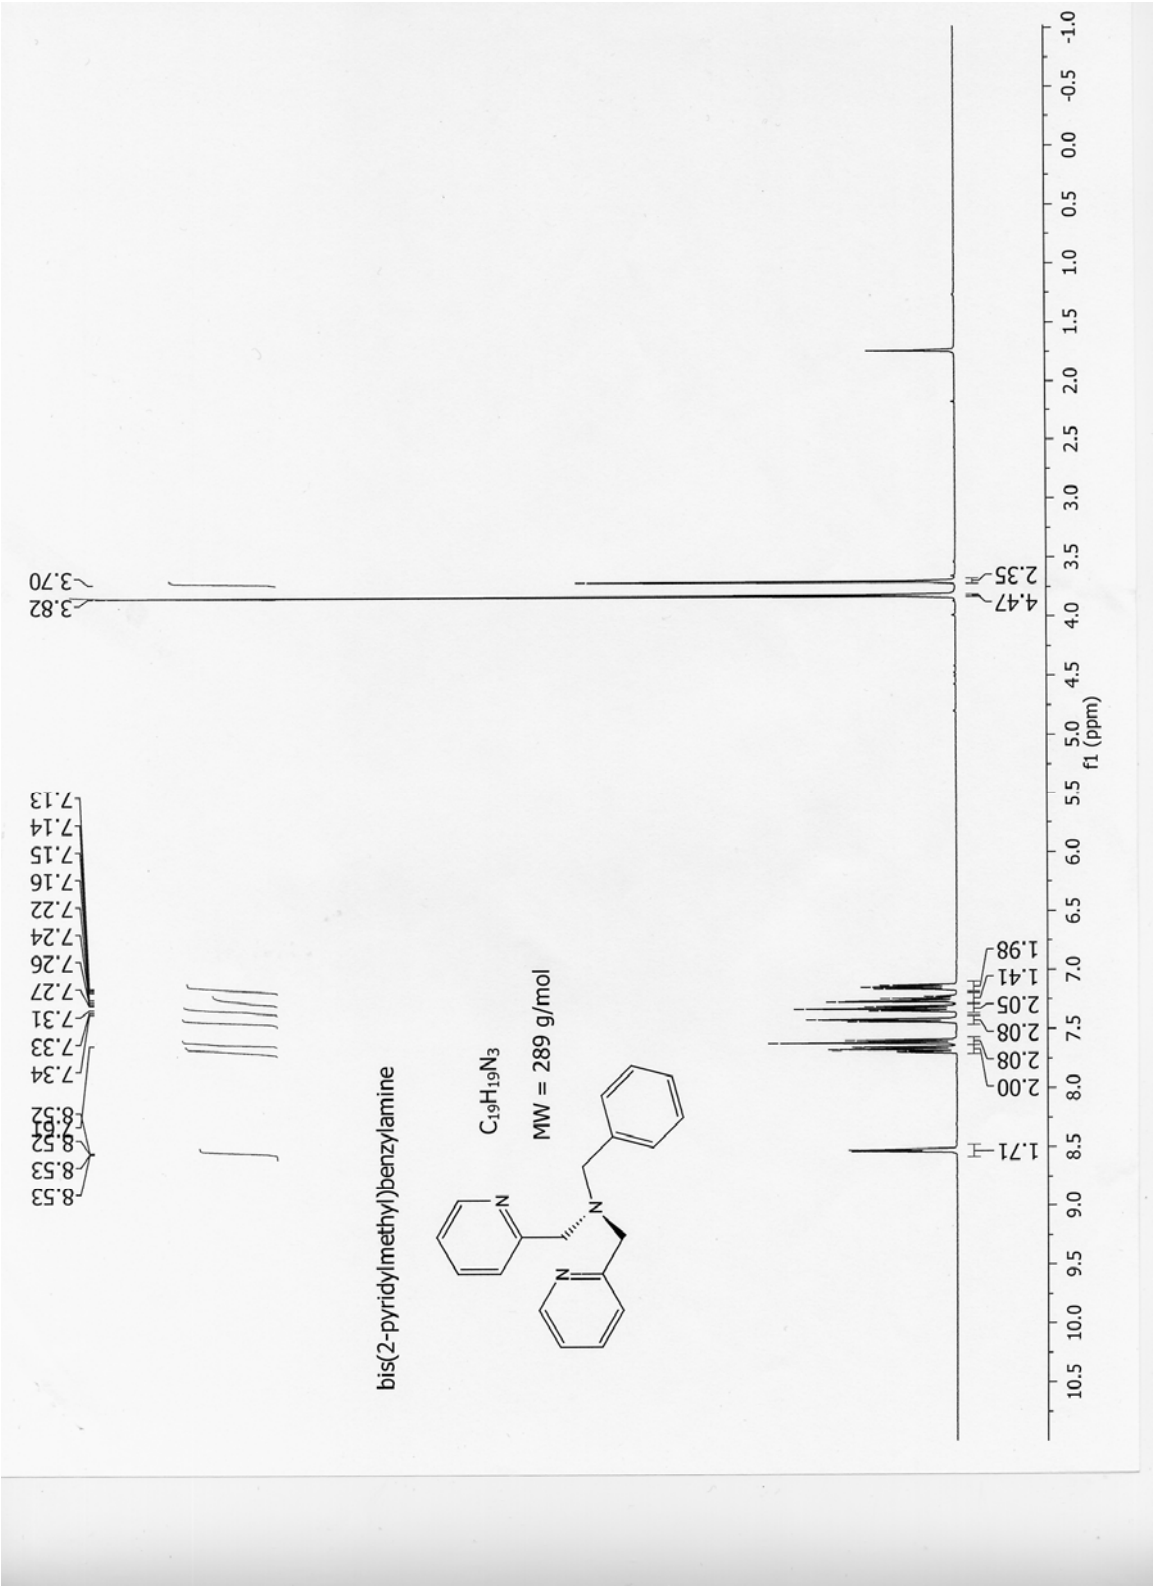

**Table 1S.** Average observed pseudo first order rate constants ( $k_{\text{obs}}$ ) vs.  $[\mathbf{4}:\text{Zn(II)}]$  for the catalyzed cleavage of HPNPP ( $\mathbf{1}$ ,  $0.05 \text{ mmol dm}^{-3}$ ) determined in anhydrous methanol at  $^{\text{s}}\text{pH} = 8.0$  (4-Ethylmorpholine buffer,  $20 \text{ mmol dm}^{-3}$ ) and  $T=25.0 \pm 0.1 \text{ }^{\circ}\text{C}$ . Values of  $k_{\text{obs}}$  are corrected for the effect of buffer on the basis of the buffer inhibition data in Table 8S.

| $[\mathbf{4}:\text{Zn(II)}] \text{ (mmol dm}^{-3}\text{)}$ | $k_{\text{obs}} \text{ (s}^{-1}\text{)}$ |
|------------------------------------------------------------|------------------------------------------|
| 0.1                                                        | 0.0000073                                |
| 0.2                                                        | 0.000011                                 |
| 0.3                                                        | 0.000024                                 |
| 0.5                                                        | 0.000057                                 |
| 1.0                                                        | 0.00014                                  |
| 1.5                                                        | 0.00022                                  |

**Table 2S.** Average observed pseudo first order rate constants ( $k_{\text{obs}}$ ) vs.  $[\mathbf{4}:\text{Zn(II)}]$  for the catalyzed cleavage of HPNPP ( $\mathbf{1}$ ,  $0.05 \text{ mmol dm}^{-3}$ ) determined in anhydrous methanol at  $^{\text{s}}\text{pH} = 8.5$  (4-Ethylmorpholine buffer,  $20 \text{ mmol dm}^{-3}$ ) and  $T=25.0 \pm 0.1 \text{ }^{\circ}\text{C}$ . Values of  $k_{\text{obs}}$  are corrected for the effect of buffer on the basis of the buffer inhibition data in Table 9S.

| $[\mathbf{4}:\text{Zn(II)}] \text{ (mmol dm}^{-3}\text{)}$ | $k_{\text{obs}} \text{ (s}^{-1}\text{)}$ |
|------------------------------------------------------------|------------------------------------------|
| 0.1                                                        | 0.000025                                 |
| 0.2                                                        | 0.000068                                 |
| 0.3                                                        | 0.00013                                  |
| 0.5                                                        | 0.00029                                  |
| 1.0                                                        | 0.00071                                  |
| 1.5                                                        | 0.0011                                   |

**Table 3S.** Average observed pseudo first order rate constants ( $k_{\text{obs}}$ ) vs.  $[\mathbf{4}:\text{Zn(II)}]$  for the catalyzed cleavage of HPNPP ( $\mathbf{1}$ ,  $0.05 \text{ mmol dm}^{-3}$ ) determined in anhydrous methanol at  $^{\text{s}}\text{pH} = 9.1$  (4-Ethylmorpholine buffer,  $20 \text{ mmol dm}^{-3}$ ) and  $T=25.0 \pm 0.1 \text{ }^{\circ}\text{C}$ . Values of  $k_{\text{obs}}$  are corrected for the effect of buffer on the basis of the buffer inhibition data in Table 10S.

| $[\mathbf{4}:\text{Zn(II)}] \text{ (mmol dm}^{-3}\text{)}$ | $k_{\text{obs}} \text{ (s}^{-1}\text{)}$ |
|------------------------------------------------------------|------------------------------------------|
| 0.1                                                        | 0.00010                                  |
| 0.2                                                        | 0.00025                                  |
| 0.3                                                        | 0.00045                                  |
| 0.5                                                        | 0.0010                                   |
| 1.0                                                        | 0.0025                                   |
| 1.5                                                        | 0.0038                                   |

**Table 4S.** Average observed pseudo first order rate constants ( $k_{\text{obs}}$ ) vs.  $[\mathbf{4}:\text{Zn(II)}]$  for the catalyzed cleavage of HPNPP ( $\mathbf{1}$ ,  $0.05 \text{ mmol dm}^{-3}$ ) determined in anhydrous methanol at  $^{\text{s}}\text{pH} = 10.1$  (triethylamine buffer,  $20 \text{ mmol dm}^{-3}$ ) and  $T=25.0 \pm 0.1 \text{ }^{\circ}\text{C}$ . Values of  $k_{\text{obs}}$  are corrected for the effect of buffer on the basis of the buffer inhibition data in Table 11S.

| [4:Zn(II)] (mmol dm <sup>-3</sup> ) | k <sub>obs</sub> (s <sup>-1</sup> ) |
|-------------------------------------|-------------------------------------|
| 0.1                                 | 0.00038                             |
| 0.2                                 | 0.00088                             |
| 0.3                                 | 0.0020                              |
| 0.5                                 | 0.0040                              |
| 1.0                                 | 0.010                               |
| 1.5                                 | 0.016                               |

**Table 5S.** Average observed pseudo first order rate constants (k<sub>obs</sub>) vs. [4:Zn(II)] for the catalyzed cleavage of HPNPP (**1**, 0.05 mmol dm<sup>-3</sup>) determined in anhydrous methanol at <sup>s</sup>pH = 10.8 (triethylamine buffer, 20 mmol dm<sup>-3</sup>) and T=25.0 ± 0.1 °C. Values of k<sub>obs</sub> are corrected for the effect of buffer on the basis of the buffer inhibition data in Table 12S.

| [4:Zn(II)] (mmol dm <sup>-3</sup> ) | k <sub>obs</sub> (s <sup>-1</sup> ) |
|-------------------------------------|-------------------------------------|
| 0.1                                 | 0.00069                             |
| 0.2                                 | 0.0026                              |
| 0.3                                 | 0.0035                              |
| 0.5                                 | 0.0078                              |
| 1.0                                 | 0.022                               |
| 1.5                                 | 0.032                               |

**Table 6S.** Average observed pseudo first order rate constants (k<sub>obs</sub>) vs. [4:Zn(II)] for the catalyzed cleavage of HPNPP (**1**, 0.05 mmol dm<sup>-3</sup>) determined in anhydrous methanol at <sup>s</sup>pH = 11.3 (triethylamine buffer, 20 mmol dm<sup>-3</sup>) and T=25.0 ± 0.1 °C. Values of k<sub>obs</sub> are corrected for the effect of buffer on the basis of the buffer inhibition data in Table 13S.

| [4:Zn(II)] (mmol dm <sup>-3</sup> ) | k <sub>obs</sub> (s <sup>-1</sup> ) |
|-------------------------------------|-------------------------------------|
| 0.1                                 | 0.0016                              |
| 0.2                                 | 0.0042                              |
| 0.3                                 | 0.0078                              |
| 0.5                                 | 0.017                               |
| 1.0                                 | 0.041                               |
| 1.5                                 | 0.061                               |

**Table 7S.** Average observed pseudo first order rate constants (k<sub>obs</sub>) vs. [4:Zn(II)] for the catalyzed cleavage of HPNPP (**1**, 0.05 mmol dm<sup>-3</sup>) determined in anhydrous methanol at <sup>s</sup>pH = 12.1 (2,2,6,6-Tetramethylpiperidine buffer, 20 mmol dm<sup>-3</sup>) and T=25.0 ± 0.1 °C. Values of k<sub>obs</sub> are corrected for the effect of buffer on the basis of the buffer inhibition data in Table 14S.

| [4:Zn(II)] (mmol dm <sup>-3</sup> ) | k <sub>obs</sub> (s <sup>-1</sup> ) |
|-------------------------------------|-------------------------------------|
| 0.1                                 | 0.0013                              |
| 0.2                                 | 0.0034                              |

|     |        |
|-----|--------|
| 0.3 | 0.0043 |
| 0.5 | 0.012  |
| 1.0 | 0.031  |
| 1.5 | 0.047  |

**Table 8S.** Average observed pseudo first order rate constants ( $k_{\text{obs}}$ ) vs. [N-ethylmorpholine] for the cleavage of HPNPP (**1**, 0.05mM) catalyzed by **4**:Zn(II) (1.0 mmol dm<sup>-3</sup>) in N-ethylmorpholine buffer ( $\text{pH} = 8.0$ ) at  $T = 25.0 \pm 0.1$  °C.

| [N-ethylmorpholine] (mmol dm <sup>-3</sup> ) | $k_{\text{obs}}$ (s <sup>-1</sup> ) |
|----------------------------------------------|-------------------------------------|
| 5                                            | 0.00013                             |
| 10                                           | 0.00012                             |
| 20                                           | 0.00012                             |

**Table 9S.** Average observed pseudo first order rate constants ( $k_{\text{obs}}$ ) vs. [N-ethylmorpholine] for the cleavage of HPNPP (**1**, 0.05 mmol dm<sup>-3</sup>) catalyzed by **4**:Zn(II) (1.0 mmol dm<sup>-3</sup>) in N-ethylmorpholine buffer ( $\text{pH} = 8.5$ ) at  $T = 25.0 \pm 0.1$  °C.

| [N-ethylmorpholine] (mmol dm <sup>-3</sup> ) | $k_{\text{obs}}$ (s <sup>-1</sup> ) |
|----------------------------------------------|-------------------------------------|
| 5                                            | 0.00075                             |
| 10                                           | 0.00075                             |
| 15                                           | 0.00071                             |
| 20                                           | 0.00071                             |

**Table 10S.** Average observed pseudo first order rate constants ( $k_{\text{obs}}$ ) vs. [N-ethylmorpholine] for the cleavage of HPNPP (**1**, 0.05 mmol dm<sup>-3</sup>) catalyzed by **4**:Zn(II) (1.0 mmol dm<sup>-3</sup>) in N-ethylmorpholine buffer ( $\text{pH} = 9.1$ ) at  $T = 25.0 \pm 0.1$  °C.

| [N-ethylmorpholine] (mmol dm <sup>-3</sup> ) | $k_{\text{obs}}$ (s <sup>-1</sup> ) |
|----------------------------------------------|-------------------------------------|
| 5                                            | 0.0023                              |
| 10                                           | 0.0024                              |
| 15                                           | 0.0025                              |
| 20                                           | 0.0025                              |

**Table 11S.** Average observed pseudo first order rate constants ( $k_{\text{obs}}$ ) vs. [triethylamine] for the cleavage of HPNPP (**1**, 0.05 mmol dm<sup>-3</sup>) catalyzed by **4**:Zn(II) (1.0 mmol dm<sup>-3</sup>) in Triethylamine buffer ( $\text{pH} = 10.1$ ) at  $T = 25.0 \pm 0.1$  °C.

| [triethylamine] (mmol dm <sup>-3</sup> ) | $k_{\text{obs}}$ (s <sup>-1</sup> ) |
|------------------------------------------|-------------------------------------|
|------------------------------------------|-------------------------------------|

|    |        |
|----|--------|
| 5  | 0.0096 |
| 10 | 0.010  |
| 15 | 0.010  |
| 20 | 0.010  |

**Table 12S.** Average observed pseudo first order rate constants ( $k_{\text{obs}}$ ) vs. [triethylamine] for the cleavage of HPNPP (**1**, 0.05 mmol dm<sup>-3</sup>) catalyzed by **4**:Zn(II) (1.0 mmol dm<sup>-3</sup>) in Triethylamine buffer ( $\text{pH} = 10.8$ ) at  $T = 25.0 \pm 0.1$  °C.

| [triethylamine] (mmol dm <sup>-3</sup> ) | $k_{\text{obs}}$ (s <sup>-1</sup> ) |
|------------------------------------------|-------------------------------------|
| 5                                        | 0.0150                              |
| 10                                       | 0.0130                              |
| 15                                       | 0.0126                              |

**Table 13S.** Average observed pseudo first order rate constants ( $k_{\text{obs}}$ ) vs. [triethylamine] for the cleavage of HPNPP (**1**, 0.05 mmol dm<sup>-3</sup>) catalyzed by **4**:Zn(II) (1.0 mmol dm<sup>-3</sup>) in triethylamine buffer ( $\text{pH} = 11.3$ ) at  $T = 25.0 \pm 0.1$  °C.

| [triethylamine] (mmol dm <sup>-3</sup> ) | $k_{\text{obs}}$ (s <sup>-1</sup> ) |
|------------------------------------------|-------------------------------------|
| 5                                        | 0.029                               |
| 10                                       | 0.026                               |
| 15                                       | 0.023                               |

**Table 14S.** Average observed pseudo first order rate constants ( $k_{\text{obs}}$ ) vs. [2,2,6,6,-tetramethylpiperidine] for the cleavage of HPNPP (**1**, 0.05 mmol dm<sup>-3</sup>) catalyzed by **4**:Zn(II) (1.0 mmol dm<sup>-3</sup>) in 2,2,6,6,-Tetramethylpiperidine buffer ( $\text{pH} = 12.1$ ) at  $T = 25.0 \pm 0.1$  °C.

| [2,2,6,6,-tetramethylpiperidine] (mmol dm <sup>-3</sup> ) | $k_{\text{obs}}$ (s <sup>-1</sup> ) |
|-----------------------------------------------------------|-------------------------------------|
| 5                                                         | 0.029                               |
| 10                                                        | 0.024                               |
| 15                                                        | 0.021                               |
| 20                                                        | 0.020                               |

**Table 15S.** Average observed pseudo first order rate constants ( $k_{\text{obs}}$ ) vs. [DBP] for the inhibition of the cleavage of **6** (0.05 mmol dm<sup>-3</sup>) catalyzed by **4**:Zn(II) (1.0 mmol dm<sup>-3</sup>) by DBP, sodium salt. Determined in anhydrous methanol at  $\text{pH} = 11.0$  and  $T = 25.0 \pm 0.1$  °C. The data were fit according to eqn. (S1) to give  $K_i = 0.18 \pm 0.6 \times 10^{-3}$  mol dm<sup>-3</sup>.

| [DBP] (mmol dm <sup>-3</sup> ) | $k_{\text{obs}}$ (s <sup>-1</sup> ) |
|--------------------------------|-------------------------------------|
|--------------------------------|-------------------------------------|

|     |        |
|-----|--------|
|     |        |
| 0.0 | 0.019  |
| 0.4 | 0.011  |
| 0.8 | 0.0082 |
| 1.2 | 0.0062 |
| 1.5 | 0.0050 |
| 2.0 | 0.0038 |
| 3.0 | 0.0026 |
| 4.0 | 0.0018 |

**Table 16S.** Average observed pseudo first order rate constants ( $k_{\text{obs}}$ ) for the cleavage of  $5.0 \times 10^{-4} \text{ mol dm}^{-3}$  HPNPP (**1**) catalyzed by  $5.0 \times 10^{-5} \text{ mol dm}^{-3}$  **4**:Zn(II) as a function of  $^{\text{s}}\text{pH}$ .

| $^{\text{s}}\text{pH}$ | $k_{\text{obs}} (\text{s}^{-1})$ |
|------------------------|----------------------------------|
| 8.36                   | 0.000020                         |
| 8.74                   | 0.000052                         |
| 9.15                   | 0.00010                          |
| 9.89                   | 0.0011                           |
| 10.60                  | 0.0033                           |
| 10.85                  | 0.0034                           |
| 11.26                  | 0.0025                           |
| 11.94                  | 0.0022                           |

**Table 17S.** Average observed pseudo first order rate constants ( $k_{\text{obs}}$ ) vs. [**5**:Zn(II)] for the catalyzed cleavage of HPNPP (**1**,  $0.05 \text{ mmol dm}^{-3}$ ) determined in anhydrous methanol at  $^{\text{s}}\text{pH} = 7.6$  (2,6-lutidine buffer,  $20 \text{ mmol dm}^{-3}$ ) and  $T = 25.0 \pm 0.1 \text{ }^{\circ}\text{C}$ . Values of  $k_{\text{obs}}$  are corrected for the effect of buffer on the basis of the buffer inhibition data in Table 25S.

| [ <b>5</b> :Zn(II)] ( $\text{mmol dm}^{-3}$ ) | $k_{\text{obs}} (\text{s}^{-1})$ |
|-----------------------------------------------|----------------------------------|
| 0.1                                           | 0.000028                         |
| 0.2                                           | 0.000083                         |
| 0.3                                           | 0.00028                          |
| 0.5                                           | 0.0012                           |
| 0.75                                          | 0.0022                           |
| 1.0                                           | 0.0036                           |
| 1.5                                           | 0.0069                           |
| 2.0                                           | 0.011                            |

**Table 18S.** Average observed pseudo first order rate constants ( $k_{\text{obs}}$ ) vs. [**5**:Zn(II)] for the catalyzed cleavage of HPNPP (**1**,  $0.05 \text{ mmol dm}^{-3}$ ) determined in anhydrous methanol at  $^{\text{s}}\text{pH} = 8.3$  (N-ethylmorpholine buffer,  $20 \text{ mmol dm}^{-3}$ ) and  $T = 25.0 \pm 0.1 \text{ }^{\circ}\text{C}$ . Values of

$k_{\text{obs}}$  are corrected for the effect of buffer on the basis of the buffer inhibition data in Table 26S.

| [ <b>5</b> :Zn(II)] (mmol dm <sup>-3</sup> ) | $k_{\text{obs}}$ (s <sup>-1</sup> ) |
|----------------------------------------------|-------------------------------------|
| 0.1                                          | 0.000086                            |
| 0.2                                          | 0.00041                             |
| 0.3                                          | 0.0012                              |
| 0.5                                          | 0.0040                              |
| 0.75                                         | 0.0085                              |
| 1.0                                          | 0.013                               |
| 1.5                                          | 0.026                               |
| 2.0                                          | 0.038                               |

**Table 19S.** Average observed pseudo first order rate constants ( $k_{\text{obs}}$ ) vs. [**5**:Zn(II)] for the catalyzed cleavage of HPNPP (**1**, 0.05 mmol dm<sup>-3</sup>) determined in anhydrous methanol at <sup>s</sup>pH = 8.6 (N-ethylmorpholine buffer, 20 mmol dm<sup>-3</sup>) and T=25.0 ± 0.1 °C. Values of  $k_{\text{obs}}$  are corrected for the effect of buffer on the basis of the buffer inhibition data in Table 27S.

| [ <b>5</b> :Zn(II)] (mmol dm <sup>-3</sup> ) | $k_{\text{obs}}$ (s <sup>-1</sup> ) |
|----------------------------------------------|-------------------------------------|
| 0.1                                          | 0.00023                             |
| 0.2                                          | 0.00094                             |
| 0.3                                          | 0.0026                              |
| 0.5                                          | 0.0089                              |
| 0.75                                         | 0.017                               |
| 1.0                                          | 0.026                               |
| 1.5                                          | 0.045                               |
| 2.0                                          | 0.064                               |

**Table 20S.** Average observed pseudo first order rate constants ( $k_{\text{obs}}$ ) vs. [**5**:Zn(II)] for the catalyzed cleavage of HPNPP (**1**, 0.05 mmol dm<sup>-3</sup>) determined in anhydrous methanol at <sup>s</sup>pH = 8.9 (N-ethylmorpholine buffer, 20 mmol dm<sup>-3</sup>) and T=25.0 ± 0.1 °C. Values of  $k_{\text{obs}}$  are corrected for the effect of buffer on the basis of the buffer inhibition data in Table 28S.

| [ <b>5</b> :Zn(II)] (mmol dm <sup>-3</sup> ) | $k_{\text{obs}}$ (s <sup>-1</sup> ) |
|----------------------------------------------|-------------------------------------|
| 0.1                                          | 0.00052                             |
| 0.2                                          | 0.0021                              |
| 0.3                                          | 0.0045                              |
| 0.5                                          | 0.013                               |
| 0.75                                         | 0.025                               |
| 1.0                                          | 0.038                               |
| 1.5                                          | 0.077                               |
| 2.0                                          | 0.10                                |

**Table 21S.** Average observed pseudo first order rate constants ( $k_{\text{obs}}$ ) vs.  $[\mathbf{5}:\text{Zn(II)}]$  for the catalyzed cleavage of HPNPP ( $\mathbf{1}$ ,  $0.05 \text{ mmol dm}^{-3}$ ) determined in anhydrous methanol at  $^{\text{s}}\text{pH} = 9.9$  (N-methylpiperidine buffer,  $20 \text{ mmol dm}^{-3}$ ) and  $T = 25.0 \pm 0.1 \text{ }^{\circ}\text{C}$ . Values of  $k_{\text{obs}}$  are corrected for the effect of buffer on the basis of the buffer inhibition data in Table 29S.

| $[\mathbf{5}:\text{Zn(II)}] \text{ (mmol dm}^{-3}\text{)}$ | $k_{\text{obs}} \text{ (s}^{-1}\text{)}$ |
|------------------------------------------------------------|------------------------------------------|
| 0.1                                                        | 0.00092                                  |
| 0.2                                                        | 0.0029                                   |
| 0.3                                                        | 0.0063                                   |
| 0.5                                                        | 0.016                                    |
| 0.75                                                       | 0.034                                    |
| 1.0                                                        | 0.053                                    |
| 1.5                                                        | 0.10                                     |
| 2.0                                                        | 0.15                                     |

**Table 22S.** Average observed pseudo first order rate constants ( $k_{\text{obs}}$ ) vs.  $[\mathbf{5}:\text{Zn(II)}]$  for the catalyzed cleavage of HPNPP ( $\mathbf{1}$ ,  $0.05 \text{ mmol dm}^{-3}$ ) determined in anhydrous methanol at  $^{\text{s}}\text{pH} = 10.4$  (triethylamine buffer,  $20 \text{ mmol dm}^{-3}$ ) and  $T = 25.0 \pm 0.1 \text{ }^{\circ}\text{C}$ . Values of  $k_{\text{obs}}$  are corrected for the effect of buffer on the basis of the buffer inhibition data in Table 30S.

| $[\mathbf{5}:\text{Zn(II)}] \text{ (mmol dm}^{-3}\text{)}$ | $k_{\text{obs}} \text{ (s}^{-1}\text{)}$ |
|------------------------------------------------------------|------------------------------------------|
| 0.1                                                        | 0.00071                                  |
| 0.2                                                        | 0.0020                                   |
| 0.3                                                        | 0.0035                                   |
| 0.5                                                        | 0.0072                                   |
| 0.75                                                       | 0.016                                    |
| 1.0                                                        | 0.024                                    |
| 1.5                                                        | 0.051                                    |
| 2.0                                                        | 0.081                                    |

**Table 23S.** Average observed pseudo first order rate constants ( $k_{\text{obs}}$ ) vs.  $[\mathbf{5}:\text{Zn(II)}]$  for the catalyzed cleavage of HPNPP ( $\mathbf{1}$ ,  $0.05 \text{ mmol dm}^{-3}$ ) determined in anhydrous methanol at  $^{\text{s}}\text{pH} = 10.9$  (triethylamine buffer,  $20 \text{ mmol dm}^{-3}$ ) and  $T = 25.0 \pm 0.1 \text{ }^{\circ}\text{C}$ . Values of  $k_{\text{obs}}$  are corrected for the effect of buffer on the basis of the buffer inhibition data in Table 31S.

| $[\mathbf{5}:\text{Zn(II)}] \text{ (mmol dm}^{-3}\text{)}$ | $k_{\text{obs}} \text{ (s}^{-1}\text{)}$ |
|------------------------------------------------------------|------------------------------------------|
| 0.1                                                        | 0.00077                                  |
| 0.2                                                        | 0.0020                                   |
| 0.3                                                        | 0.0033                                   |
| 0.5                                                        | 0.0061                                   |
| 0.75                                                       | 0.011                                    |

|     |       |
|-----|-------|
| 1.0 | 0.016 |
| 1.5 | 0.030 |
| 2.0 | 0.050 |

**Table 24S.** Average observed pseudo first order rate constants ( $k_{\text{obs}}$ ) vs.  $[\mathbf{5}:\text{Zn(II)}]$  for the catalyzed cleavage of HPNPP ( $\mathbf{1}$ ,  $0.05 \text{ mmol dm}^{-3}$ ) determined in anhydrous methanol at  $^{\text{s}}\text{pH} = 11.2$  (triethylamine buffer,  $20 \text{ mmol dm}^{-3}$ ) and  $T = 25.0 \pm 0.1 \text{ }^{\circ}\text{C}$ . Values of  $k_{\text{obs}}$  are corrected for the effect of buffer on the basis of the buffer inhibition data in Table 32S.

| $[\mathbf{5}:\text{Zn(II)}] \text{ (mmol dm}^{-3}\text{)}$ | $k_{\text{obs}} \text{ (s}^{-1}\text{)}$ |
|------------------------------------------------------------|------------------------------------------|
| 0.1                                                        | 0.00089                                  |
| 0.2                                                        | 0.0019                                   |
| 0.3                                                        | 0.0030                                   |
| 0.5                                                        | 0.0060                                   |
| 0.75                                                       | 0.011                                    |
| 1.0                                                        | 0.016                                    |
| 1.5                                                        | 0.024                                    |
| 2.0                                                        | 0.043                                    |

**Table 25S.** Average observed pseudo first order rate constants ( $k_{\text{obs}}$ ) vs.  $[\mathbf{5}:\text{Zn(II)}]$  for the catalyzed cleavage of HPNPP ( $\mathbf{1}$ ,  $0.05 \text{ mmol dm}^{-3}$ ) determined in anhydrous methanol at  $^{\text{s}}\text{pH} = 12.0$  (2,2,6,6-tetramethylpiperidine buffer,  $20 \text{ mmol dm}^{-3}$ ) and  $T = 25.0 \pm 0.1 \text{ }^{\circ}\text{C}$ . Values of  $k_{\text{obs}}$  are corrected for the effect of buffer on the basis of the buffer inhibition data in Table 33S.

| $[\mathbf{5}:\text{Zn(II)}] \text{ (mmol dm}^{-3}\text{)}$ | $k_{\text{obs}} \text{ (s}^{-1}\text{)}$ |
|------------------------------------------------------------|------------------------------------------|
| 0.1                                                        | 0.00016                                  |
| 0.2                                                        | 0.00037                                  |
| 0.3                                                        | 0.00055                                  |
| 0.5                                                        | 0.0011                                   |
| 0.75                                                       | 0.0018                                   |
| 1.0                                                        | 0.0026                                   |
| 1.5                                                        | 0.0044                                   |
| 2.0                                                        | 0.0075                                   |

**Table 26S.** Average observed pseudo first order rate constants ( $k_{\text{obs}}$ ) vs. [2,6-lutidine] for the cleavage of HPNPP ( $\mathbf{1}$ ,  $0.05 \text{ mmol dm}^{-3}$ ) catalyzed by  $\mathbf{5}:\text{Zn(II)}$  ( $1.0 \text{ mmol dm}^{-3}$ ) in 2,6-Lutidine buffer ( $^{\text{s}}\text{pH} = 7.6$ ) at  $T = 25.0 \pm 0.1 \text{ }^{\circ}\text{C}$ .

| [2,6-Lutidine] ( $\text{mmol dm}^{-3}$ ) | $k_{\text{obs}} \text{ (s}^{-1}\text{)}$ |
|------------------------------------------|------------------------------------------|
| 5                                        | 0.0039                                   |
| 10                                       | 0.0036                                   |
| 20                                       | 0.0036                                   |

**Table 27S.** Average observed pseudo first order rate constants ( $k_{\text{obs}}$ ) vs. [N-ethylmorpholine] for the cleavage of HPNPP (**1**, 0.05 mmol dm<sup>-3</sup>) catalyzed by **5**:Zn(II) (1.0 mmol dm<sup>-3</sup>) in N-ethylmorpholine buffer ( $\text{pH} = 8.3$ ) at  $T = 25.0 \pm 0.1$  °C.

| [N-ethylmorpholine] (mmol dm <sup>-3</sup> ) | $k_{\text{obs}}$ (s <sup>-1</sup> ) |
|----------------------------------------------|-------------------------------------|
| 5                                            | 0.0073                              |
| 10                                           | 0.0071                              |
| 20                                           | 0.0068                              |

**Table 28S.** Average observed pseudo first order rate constants ( $k_{\text{obs}}$ ) vs. [N-ethylmorpholine] for the cleavage of HPNPP (**1**, 0.05 mmol dm<sup>-3</sup>) catalyzed by **5**:Zn(II) (1.0 mmol dm<sup>-3</sup>) in N-ethylmorpholine buffer ( $\text{pH} = 8.6$ ) at  $T = 25.0 \pm 0.1$  °C.

| [N-ethylmorpholine] (mmol dm <sup>-3</sup> ) | $k_{\text{obs}}$ (s <sup>-1</sup> ) |
|----------------------------------------------|-------------------------------------|
| 5                                            | 0.018                               |
| 10                                           | 0.019                               |
| 20                                           | 0.019                               |

**Table 29S.** Average observed pseudo first order rate constants ( $k_{\text{obs}}$ ) vs. [N-ethylmorpholine] for the cleavage of HPNPP (**1**, 0.05 mmol dm<sup>-3</sup>) catalyzed by **5**:Zn(II) (1.0 mmol dm<sup>-3</sup>) in N-ethylmorpholine buffer ( $\text{pH} = 8.9$ ) at  $T = 25.0 \pm 0.1$  °C.

| [N-ethylmorpholine] (mmol dm <sup>-3</sup> ) | $k_{\text{obs}}$ (s <sup>-1</sup> ) |
|----------------------------------------------|-------------------------------------|
| 5                                            | 0.030                               |
| 10                                           | 0.031                               |
| 20                                           | 0.033                               |

**Table 30S.** Average observed pseudo first order rate constants ( $k_{\text{obs}}$ ) vs. [N-methylpiperidine] for the cleavage of HPNPP (**1**, 0.05 mmol dm<sup>-3</sup>) catalyzed by **5**:Zn(II) (1.0 mmol dm<sup>-3</sup>) in N-methylpiperidine buffer ( $\text{pH} = 9.9$ ) at  $T = 25.0 \pm 0.1$  °C.

| [N-methylpiperidine] (mmol dm <sup>-3</sup> ) | $k_{\text{obs}}$ (s <sup>-1</sup> ) |
|-----------------------------------------------|-------------------------------------|
| 5                                             | 0.051                               |
| 10                                            | 0.046                               |
| 20                                            | 0.041                               |

**Table 31S.** Average observed pseudo first order rate constants ( $k_{\text{obs}}$ ) vs. [triethylamine] for the cleavage of HPNPP (**1**, 0.05 mmol dm<sup>-3</sup>) catalyzed by **5**:Zn(II) (1.0 mmol dm<sup>-3</sup>) in Triethylamine buffer ( $\text{pH} = 10.4$ ) at  $T = 25.0 \pm 0.1$  °C.

| [triethylamine] (mmol dm <sup>-3</sup> ) | k <sub>obs</sub> (s <sup>-1</sup> ) |
|------------------------------------------|-------------------------------------|
| 5                                        | 0.038                               |
| 10                                       | 0.040                               |
| 20                                       | 0.039                               |

**Table 32S.** Average observed pseudo first order rate constants (k<sub>obs</sub>) vs. [triethylamine] for the cleavage of HPNPP (**1**, 0.05 mmol dm<sup>-3</sup>) catalyzed by **5**:Zn(II) (1.0 mmol dm<sup>-3</sup>) in Triethylamine buffer (<sup>s</sup>pH = 10.9) at T=25.0 ± 0.1 °C.

| [triethylamine] (mmol dm <sup>-3</sup> ) | k <sub>obs</sub> (s <sup>-1</sup> ) |
|------------------------------------------|-------------------------------------|
| 20                                       | 0.015                               |
| 30                                       | 0.013                               |
| 50                                       | 0.011                               |

**Table 33S.** Average observed pseudo first order rate constants (k<sub>obs</sub>) vs. [triethylamine] for the cleavage of HPNPP (**1**, 0.05 mmol dm<sup>-3</sup>) catalyzed by **5**:Zn(II) (1.0 mmol dm<sup>-3</sup>) in Triethylamine buffer (<sup>s</sup>pH = 11.2) at T=25.0 ± 0.1 °C.

| [triethylamine] (mmol dm <sup>-3</sup> ) | k <sub>obs</sub> (s <sup>-1</sup> ) |
|------------------------------------------|-------------------------------------|
| 5                                        | 0.016                               |
| 10                                       | 0.012                               |
| 20                                       | 0.0093                              |

**Table 34S.** Average observed pseudo first order rate constants (k<sub>obs</sub>) vs. [2,2,6,6-Tetramethylpiperidine] for the cleavage of HPNPP (**1**, 0.05 mmol dm<sup>-3</sup>) catalyzed by **5**:Zn(II) (1.0 mmol dm<sup>-3</sup>) in 2,2,6,6-Tetramethylpiperidine buffer (<sup>s</sup>pH = 12.0) at T=25.0 ± 0.1 °C.

| [2,2,6,6-Tetramethylpiperidine] (mmol dm <sup>-3</sup> ) | k <sub>obs</sub> (s <sup>-1</sup> ) |
|----------------------------------------------------------|-------------------------------------|
| 20                                                       | 0.0028                              |
| 30                                                       | 0.0024                              |
| 50                                                       | 0.0018                              |

**Table 35S.** Average observed pseudo first order rate constants (k<sub>obs</sub>) vs. [DBP] for the inhibition of the cleavage of **6** (0.05 mmol dm<sup>-3</sup>) catalyzed by **4**:Zn(II) (1.0 mmol dm<sup>-3</sup>) by DBP, sodium salt. Determined in anhydrous methanol at <sup>s</sup>pH = 11.0 and T=25.0 ± 0.1 °C. The data were fit according to eqn. (S1) to give K<sub>i</sub> = 0.18 ± 0.6 x10<sup>-3</sup> mol dm<sup>-3</sup>.

| [DBP] (mM) | k <sub>obs</sub> (s <sup>-1</sup> ) |
|------------|-------------------------------------|
| 0.0        | 0.049                               |
| 0.4        | 0.033                               |

|     |         |
|-----|---------|
| 0.8 | 0.021   |
| 1.2 | 0.012   |
| 1.5 | 0.0070  |
| 2.0 | 0.0028  |
| 3.0 | 0.00062 |

**Table 36S.** Average observed pseudo first order rate constants ( $k_{\text{obs}}$ ) for the cleavage of  $5.0 \times 10^{-4} \text{ mol dm}^{-3}$  HPNPP (**1**) Catalyzed by  $5.0 \times 10^{-5} \text{ mol dm}^{-3}$  **5**:Zn(II) as a function of  $^{\text{s}}\text{pH}$ .

| $^{\text{s}}\text{pH}$ | $k_{\text{obs}} (\text{s}^{-1})$ |
|------------------------|----------------------------------|
| 7.60                   | 0.000022                         |
| 8.30                   | 0.000083                         |
| 8.64                   | 0.00020                          |
| 8.94                   | 0.00033                          |
| 9.90                   | 0.00091                          |
| 10.39                  | 0.0013                           |
| 10.80                  | 0.0023                           |
| 10.85                  | 0.0016                           |
| 12.00                  | 0.00046                          |

**Figure 1S.** Plot of  $k_{\text{obs}}$  vs.  $[\mathbf{4}:\text{Zn(II)}]$  for the catalyzed cleavage of HPNPP (**1**,  $0.05 \text{ mmol dm}^{-3}$ ) determined in anhydrous methanol at  $^{\text{s}}\text{pH} = 8.0$  (4-Ethylmorpholine buffer,  $20 \text{ mmol dm}^{-3}$ ) and  $T = 25.0 \pm 0.1 \text{ }^{\circ}\text{C}$ . Data corrected for buffer inhibition as described in the article text. Dashed line through the data represents fit to eqn. (1) in the main text.

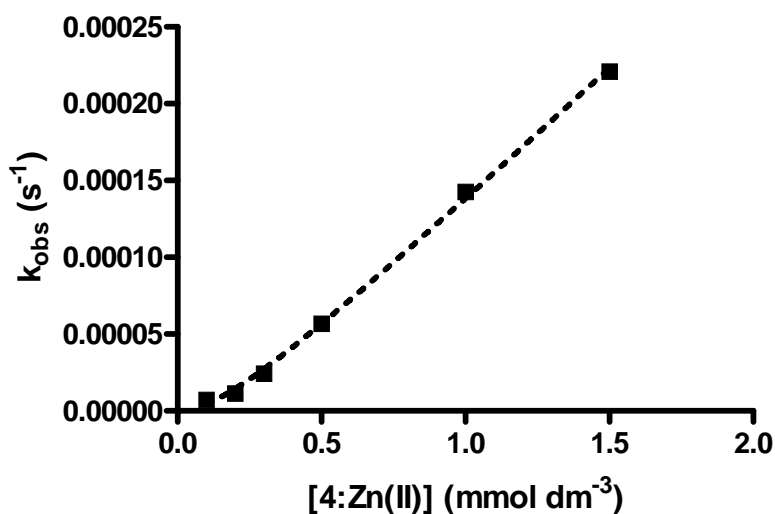

**Figure 2S.** Plot of  $k_{\text{obs}}$  vs.  $[4:\text{Zn(II)}]$  for the catalyzed cleavage of HPNPP (**1**, 0.05 mmol  $\text{dm}^{-3}$ ) determined in anhydrous methanol at  $^{\text{s}}\text{pH} = 8.5$  (4-Ethylmorpholine buffer, 20 mmol  $\text{dm}^{-3}$ ) and  $T=25.0 \pm 0.1$  °C. Data corrected for buffer inhibition as described in the article text. Dashed line through the data represents fit to eqn. (1) in the main text.

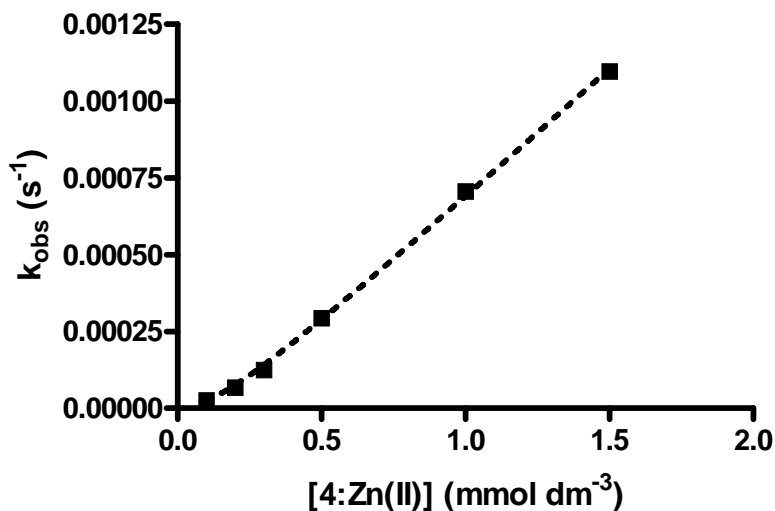

**Figure 3S.** Plot of  $k_{\text{obs}}$  vs.  $[4:\text{Zn(II)}]$  for the catalyzed cleavage of HPNPP (**1**, 0.05 mmol  $\text{dm}^{-3}$ ) determined in anhydrous methanol at  $^{\text{s}}\text{pH} = 9.1$  (4-Ethylmorpholine buffer, 20 mmol  $\text{dm}^{-3}$ ) and  $T=25.0 \pm 0.1$  °C. Data corrected for buffer inhibition as described in the article text. Dashed line through the data represents fit to eqn. (1) in the main text.

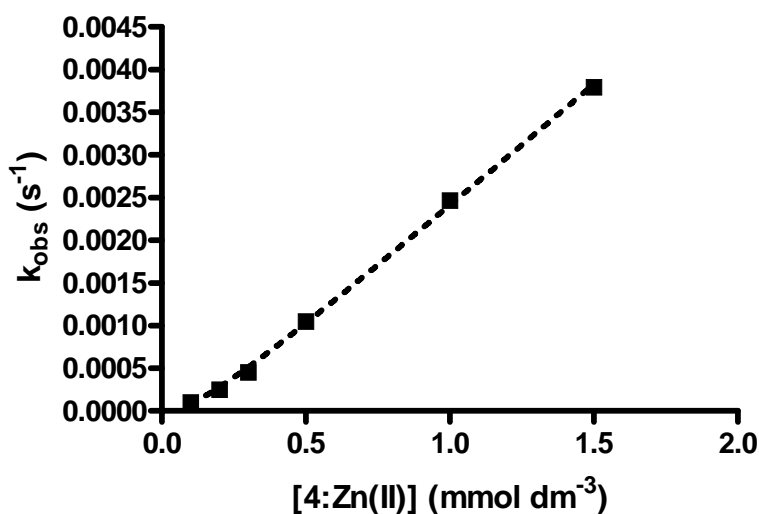

**Figure 4S.** Plot of  $k_{\text{obs}}$  vs.  $[4:\text{Zn(II)}]$  for the catalyzed cleavage of HPNPP (**1**, 0.05 mmol  $\text{dm}^{-3}$ ) determined in anhydrous methanol at  $^{\text{s}}\text{pH} = 10.1$  (triethylamine buffer, 20 mmol  $\text{dm}^{-3}$ ) and  $T = 25.0 \pm 0.1$  °C. Data corrected for buffer inhibition as described in the article text. Dashed line through the data represents fit to eqn. (1) in the main text.

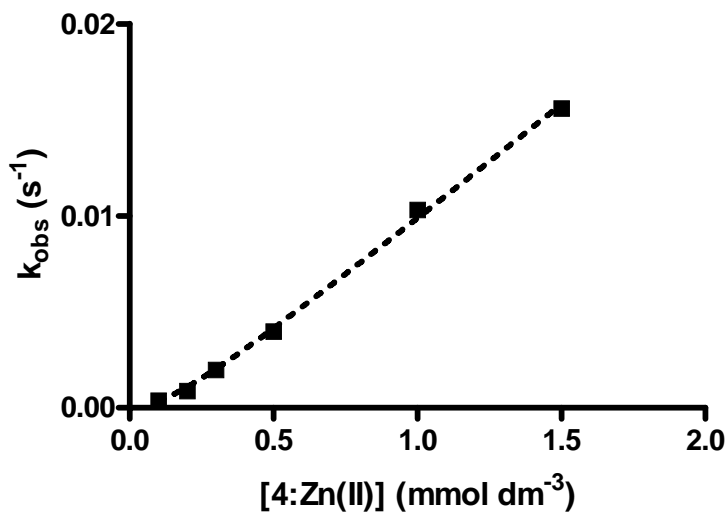

**Figure 5S.** Plot of  $k_{\text{obs}}$  vs.  $[4:\text{Zn(II)}]$  for the catalyzed cleavage of HPNPP (**1**, 0.05 mmol  $\text{dm}^{-3}$ ) determined in anhydrous methanol at  $^{\text{s}}\text{pH} = 10.8$  (triethylamine buffer, 20 mmol  $\text{dm}^{-3}$ ) and  $T = 25.0 \pm 0.1$  °C. Data corrected for buffer inhibition as described in the article text. Dashed line through the data represents fit to eqn. (1) in the main text.

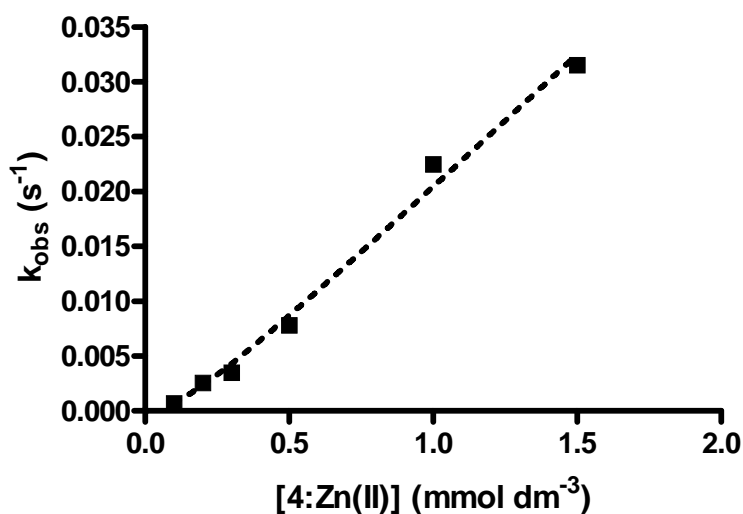

**Figure 6S.** Plot of  $k_{\text{obs}}$  vs.  $[4:\text{Zn(II)}]$  for the catalyzed cleavage of HPNPP (**1**, 0.05 mmol  $\text{dm}^{-3}$ ) determined in anhydrous methanol at  $^{\text{s}}\text{pH} = 11.3$  (triethylamine buffer, 20 mmol  $\text{dm}^{-3}$ ) and  $T=25.0 \pm 0.1$  °C. Data corrected for buffer inhibition as described in the article text. Dashed line through the data represents fit to eqn. (1) in the main text.

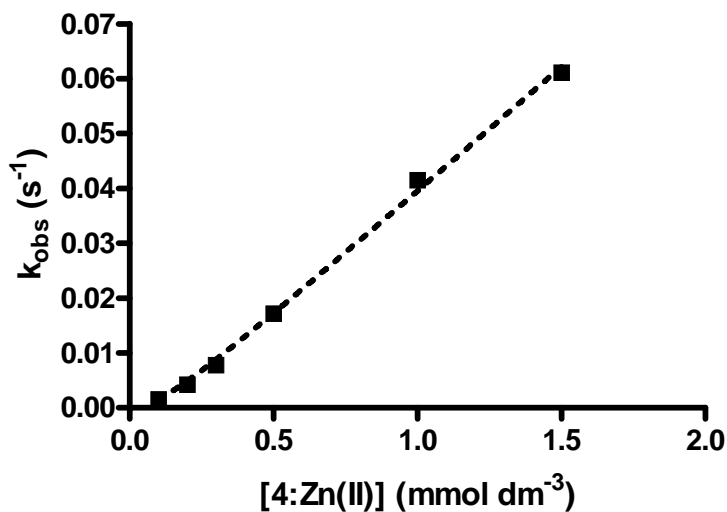

**Figure 7S.** Plot of  $k_{\text{obs}}$  vs.  $[4:\text{Zn(II)}]$  for the catalyzed cleavage of HPNPP (**1**, 0.05 mmol  $\text{dm}^{-3}$ ) determined in anhydrous methanol at  $^{\text{s}}\text{pH} = 12.1$  (2,2,6,6-Tetramethylpiperidine buffer, 20 mmol  $\text{dm}^{-3}$ ) and  $T=25.0 \pm 0.1$  °C. Data corrected for buffer inhibition as

described in the article text. Dashed line through the data represents fit to eqn. (1) in the main text.

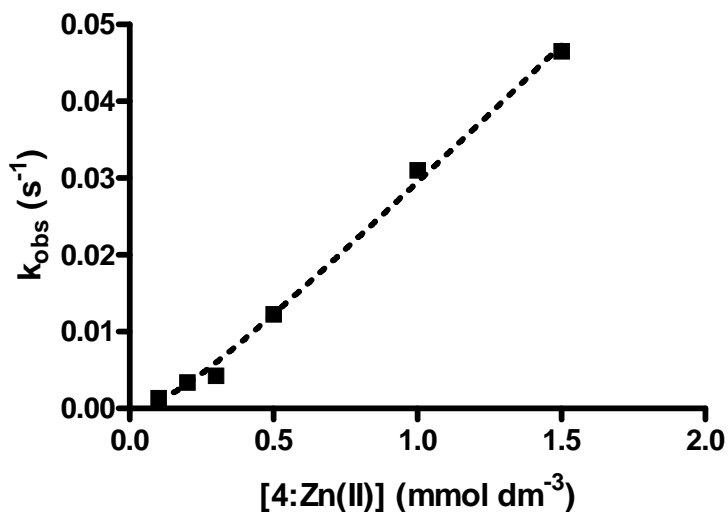

**Figure 8S.** Buffer inhibition plot showing observed pseudo-first order rate constants ( $k_{obs}$ ) vs. [N-ethylmorpholine] for the cleavage of HPNPP (**1**,  $0.05 mmol dm^{-3}$ ) catalyzed by **4**:Zn(II) ( $1.0 mmol dm^{-3}$ ) in N-ethylmorpholine buffer at  $pH = 8.0$  and  $T = 25.0 \pm 0.1 ^\circ C$ .

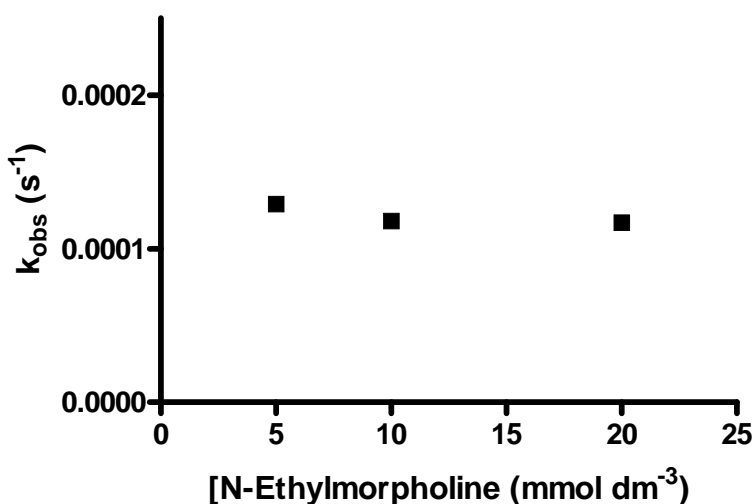

**Figure 9S.** Buffer inhibition plot showing observed pseudo first order rate constants ( $k_{obs}$ ) vs. [N-ethylmorpholine] for the cleavage of HPNPP (**1**,  $0.05 mmol dm^{-3}$ ) catalyzed

by **4**:Zn(II) ( $1.0 \text{ mmol dm}^{-3}$ ) in N-ethylmorpholine buffer at  $\text{pH} = 8.5$  and  $T = 25.0 \pm 0.1$  °C.

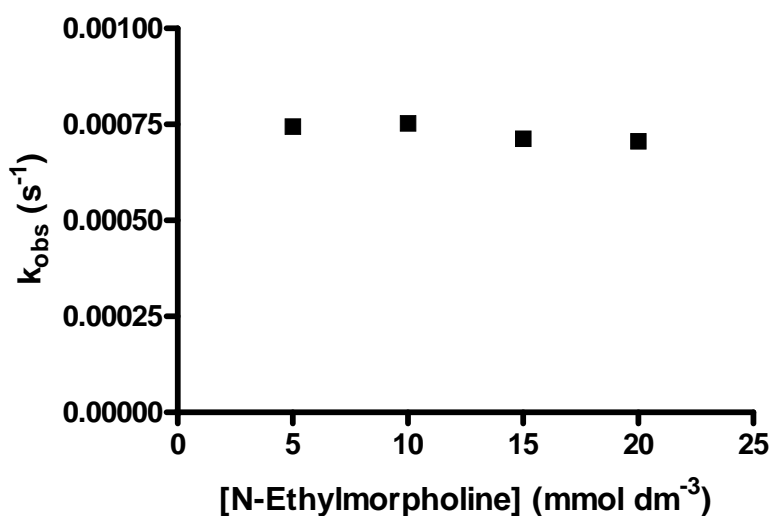

**Figure 10S.** Buffer inhibition plot showing observed pseudo first order rate constants ( $k_{\text{obs}}$ ) vs. [N-ethylmorpholine] for the cleavage of HPNPP (**1**,  $0.05 \text{ mmol dm}^{-3}$ ) catalyzed by **4**:Zn(II) ( $1.0 \text{ mmol dm}^{-3}$ ) in N-ethylmorpholine buffer at  $\text{pH} = 9.1$  and  $T = 25.0 \pm 0.1$  °C.

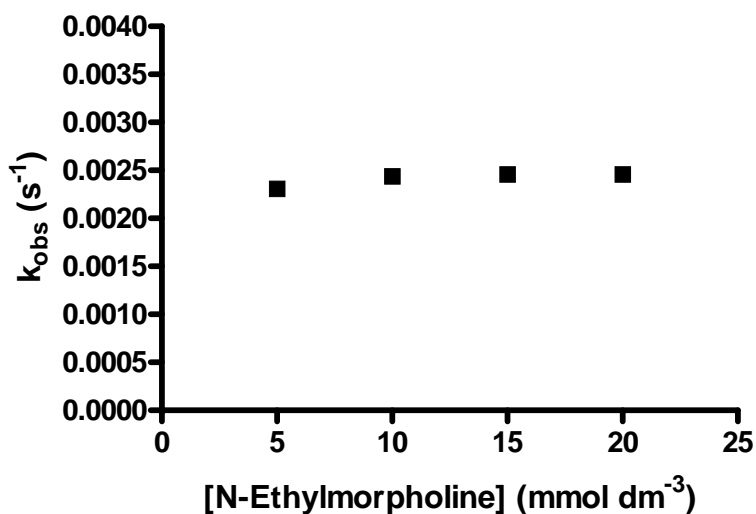

**Figure 11S.** Buffer inhibition plot showing observed pseudo first order rate constants ( $k_{\text{obs}}$ ) vs. [triethylamine] for the cleavage of HPNPP (**1**,  $0.05 \text{ mmol dm}^{-3}$ ) catalyzed by **4**:Zn(II) ( $1.0 \text{ mmol dm}^{-3}$ ) in triethylamine buffer at  $\text{pH} = 10.1$  and  $T = 25.0 \pm 0.1 \text{ }^{\circ}\text{C}$ .

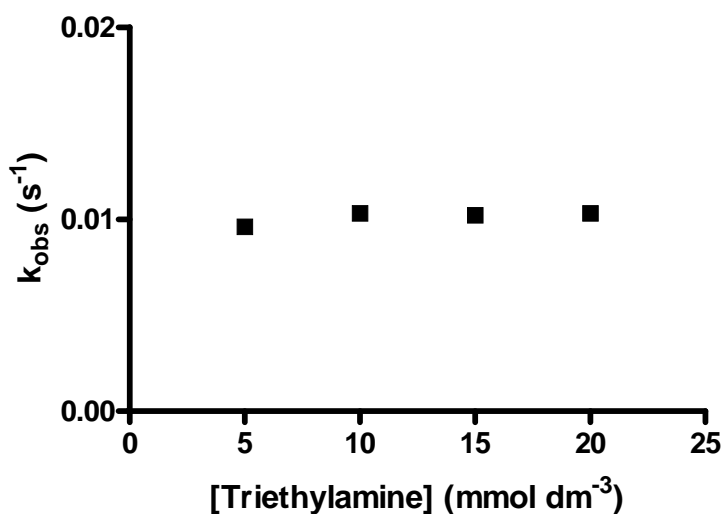

**Figure 12S.** Buffer inhibition plot showing observed pseudo first order rate constants ( $k_{\text{obs}}$ ) vs. [triethylamine] for the cleavage of HPNPP (**1**,  $0.05 \text{ mmol dm}^{-3}$ ) catalyzed by **4**:Zn(II) ( $1.0 \text{ mmol dm}^{-3}$ ) in triethylamine buffer at  $\text{pH} = 10.8$  and  $T = 25.0 \pm 0.1 \text{ }^{\circ}\text{C}$ .

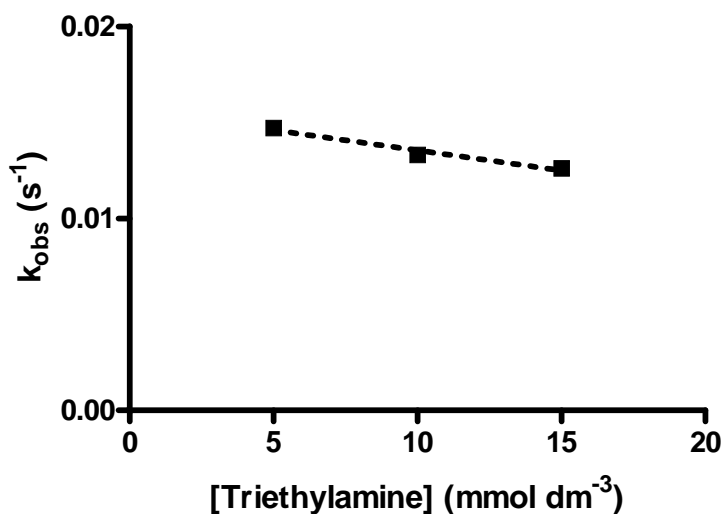

**Figure 13S.** Buffer inhibition plot showing observed pseudo first order rate constants ( $k_{\text{obs}}$ ) vs. [triethylamine] for the cleavage of HPNPP (**1**,  $0.05 \text{ mmol dm}^{-3}$ ) catalyzed by **4**:Zn(II) ( $1.0 \text{ mmol dm}^{-3}$ ) in triethylamine buffer at  $\text{pH} = 11.3$  and  $T = 25.0 \pm 0.1 \text{ }^{\circ}\text{C}$ .

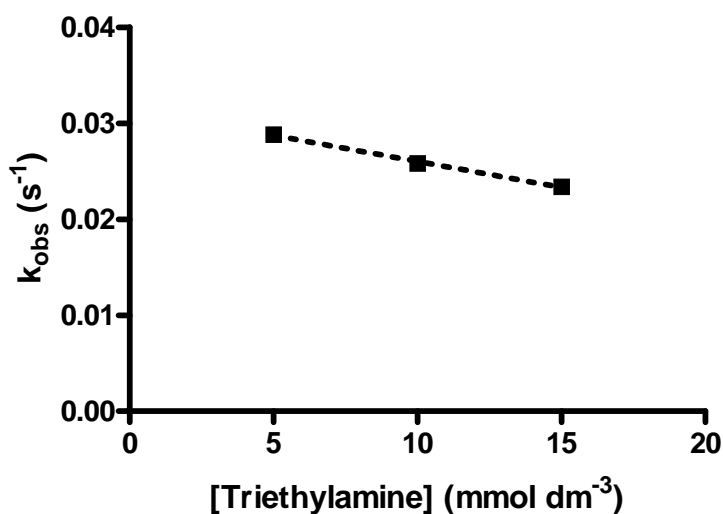

**Figure 14S.** Buffer inhibition plot showing observed pseudo first order rate constants ( $k_{\text{obs}}$ ) vs. [2,2,6,6-tetramethylpiperidine] for the cleavage of HPNPP (**1**,  $0.05 \text{ mmol dm}^{-3}$ ) catalyzed by **4**:Zn(II) ( $1.0 \text{ mmol dm}^{-3}$ ) in 2,2,6,6-tetramethylpiperidine buffer at  $\text{pH} = 12.1$  and  $T = 25.0 \pm 0.1 \text{ }^{\circ}\text{C}$ .

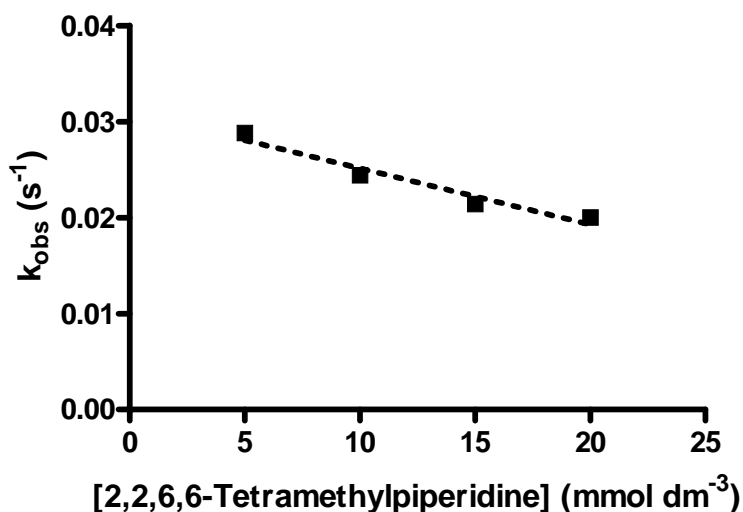

**Figure 15S.** Plot of ( $k_{\text{obs}}$ ) vs. [DBP] for the inhibition of the cleavage of **6** ( $0.05 \text{ mmol dm}^{-3}$ ) catalyzed by **4**:Zn(II) ( $1.0 \text{ mmol dm}^{-3}$ ) by DBP, sodium salt. Determined in anhydrous methanol at  $\text{pH} = 11.0$  and  $T = 25.0 \pm 0.1 \text{ }^{\circ}\text{C}$ . Dashed line through the data points represents the fit to eqn. (S1).

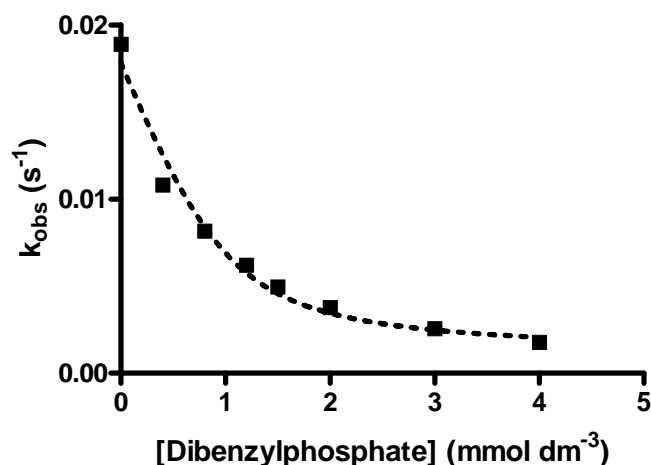

**Eqn. S1.**

$$k_{\text{obs}} = k_{\text{cat}}(1 + K_{\text{B}} \times [\text{S}] + [\text{In}] \times K_{\text{B}} - X) / (2K_{\text{B}}) / [\text{S}] \times (1 + K_{\text{B}} \times [\text{S}] + [\text{In}] \times K_{\text{B}} - X) / (2K_{\text{B}}) / [\text{S}]$$

where:

$$X = (1 + 2K_{\text{B}} \times [\text{S}] + 2 \times [\text{In}] \times K_{\text{B}} + K_{\text{B}}^2 \times [\text{S}]^2 - 2 \times K_{\text{B}}^2 \times [\text{In}][\text{S}] + [\text{In}]^2 \times K_{\text{B}}^2)^{0.5}$$

**Figure 16S.** Plot of  $\log k_1^{\text{cat}}$  vs  $^s\text{pH}$  for the cyclization of **1** ( $5.0 \times 10^{-4} \text{ mol dm}^{-3}$ ) catalyzed by **4:Zn(II)** ( $5.0 \times 10^{-5} \text{ mol dm}^{-3}$ ) in buffered methanol at  $T = 25.0 \pm 0.1 \text{ }^\circ\text{C}$ . Dashed line through the data represents fit to eqn. (2) in the main text which gave  $^s\text{pK}_a = 10.5 \pm 0.2$  and  $k_1^{\text{max}} = 0.004 \pm 0.001 \text{ s}^{-1}$ .

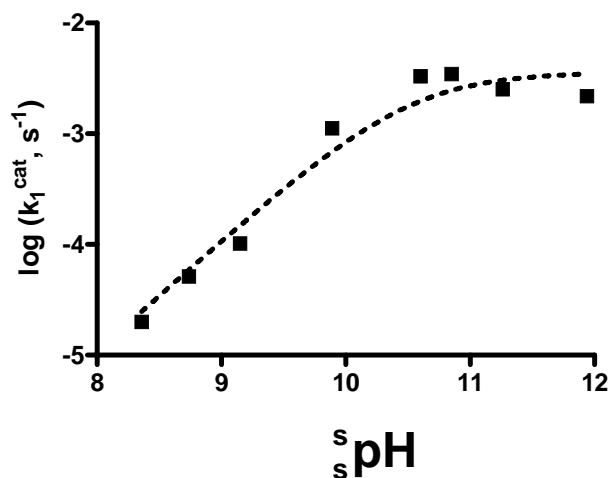

**Figure 17S.** Plot of  $k_{\text{obs}}$  vs.  $[\text{5:Zn(II)}]$  for the catalyzed cleavage of HPNPP (**1**,  $0.05 \text{ mmol dm}^{-3}$ ) determined in anhydrous methanol at  $^s\text{pH} = 7.6$  (2,6-Lutidine buffer,  $20 \text{ mmol dm}^{-3}$ ) and  $T = 25.0 \pm 0.1 \text{ }^\circ\text{C}$ . Data corrected for buffer inhibition as described in the article text. Dashed line through the data represents fit to eqn. (1) in the main text.

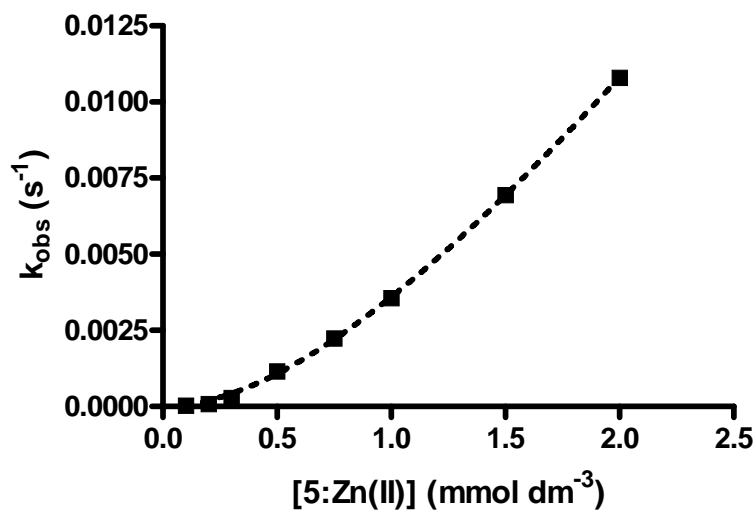

**Figure 18S.** Plot of  $k_{\text{obs}}$  vs.  $[5:\text{Zn(II)}]$  for the catalyzed cleavage of HPNPP (**1**,  $0.05 \text{ mmol dm}^{-3}$ ) determined in anhydrous methanol at  $\text{pH} = 8.3$  (N-ethylmorpholine buffer,  $20 \text{ mmol dm}^{-3}$ ) and  $T = 25.0 \pm 0.1 \text{ }^{\circ}\text{C}$ . Data corrected for buffer inhibition as described in the article text. Dashed line through the data represents fit to eqn. (1) in the main text.

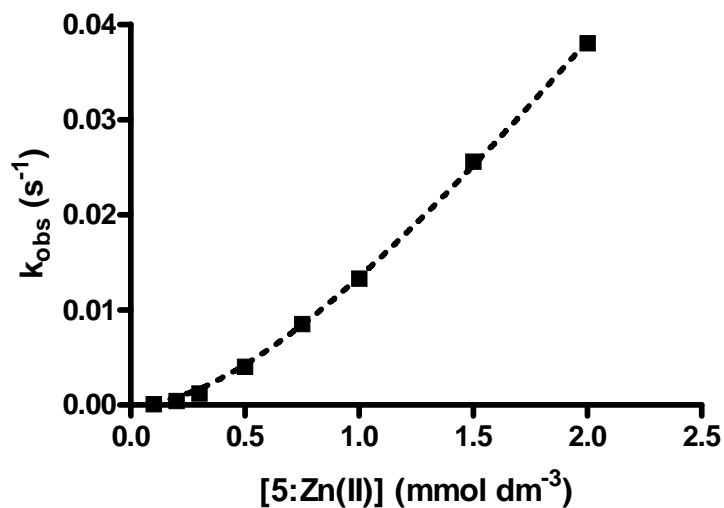

**Figure 19S.** Plot of  $k_{\text{obs}}$  vs.  $[5:\text{Zn(II)}]$  for the catalyzed cleavage of HPNPP (**1**,  $0.05 \text{ mmol dm}^{-3}$ ) determined in anhydrous methanol at  $\text{pH} = 8.6$  (N-ethylmorpholine buffer,  $20 \text{ mmol dm}^{-3}$ ) and  $T = 25.0 \pm 0.1 \text{ }^{\circ}\text{C}$ . Data corrected for buffer inhibition as described in the article text. Dashed line through the data represents fit to eqn. (1) in the main text.

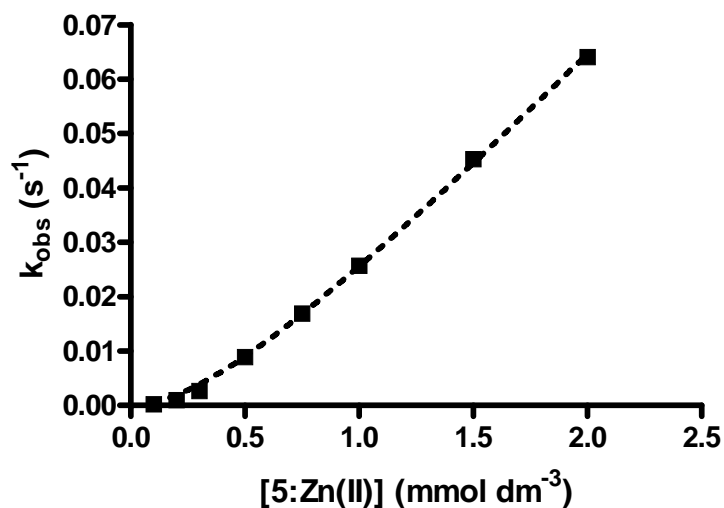

**Figure 20S.** Plot of  $k_{\text{obs}}$  vs.  $[5:\text{Zn(II)}]$  for the catalyzed cleavage of HPNPP (**1**, 0.05 mmol dm<sup>-3</sup>) determined in anhydrous methanol at  $\text{pH} = 8.9$  (N-ethylmorpholine buffer, 20 mmol dm<sup>-3</sup>) and  $T = 25.0 \pm 0.1$  °C. Data corrected for buffer inhibition as described in the article text. Dashed line through the data represents fit to eqn. (1) in the main text.

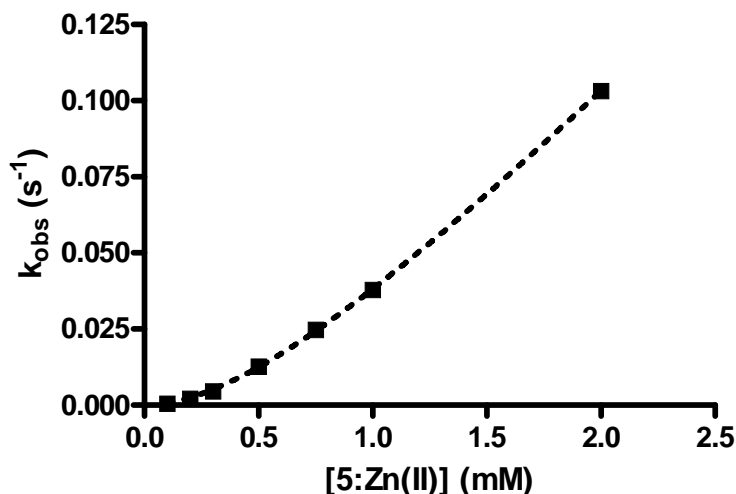

**Figure 21S.** Plot of  $k_{\text{obs}}$  vs.  $[5:\text{Zn(II)}]$  for the catalyzed cleavage of HPNPP (**1**, 0.05 mmol dm<sup>-3</sup>) determined in anhydrous methanol at  $\text{pH} = 9.9$  (N-methylpiperidine buffer, 20 mmol dm<sup>-3</sup>) and  $T = 25.0 \pm 0.1$  °C. Data corrected for buffer inhibition as described in the article text. Dashed line through the data represents fit to eqn. (1) in the main text.

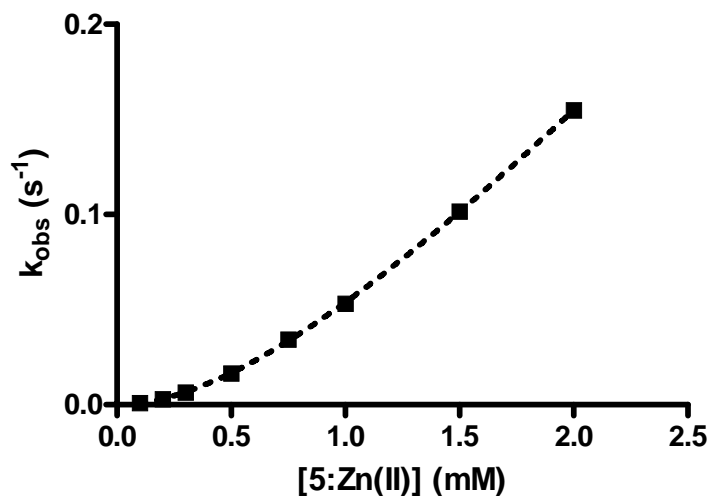

**Figure 22S.** Plot of  $k_{\text{obs}}$  vs.  $[5:\text{Zn(II)}]$  for the catalyzed cleavage of HPNPP (**1**, 0.05 mmol dm<sup>-3</sup>) determined in anhydrous methanol at  $\text{pH} = 10.4$  (triethylamine buffer, 20 mmol dm<sup>-3</sup>) and  $T = 25.0 \pm 0.1$  °C. Data corrected for buffer inhibition as described in the article text. Dashed line through the data represents fit to eqn. (1) in the main text.

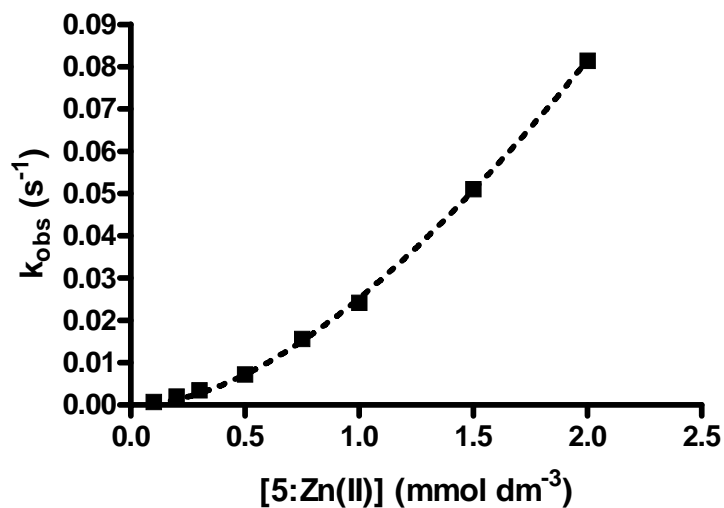

**Figure 23S.** Plot of  $k_{\text{obs}}$  vs.  $[5:\text{Zn(II)}]$  for the catalyzed cleavage of HPNPP (**1**, 0.05 mmol dm<sup>-3</sup>) determined in anhydrous methanol at  $\text{pH} = 10.9$  (triethylamine buffer, 20 mmol dm<sup>-3</sup>) and  $T = 25.0 \pm 0.1$  °C. Data corrected for buffer inhibition as described in the article text. Dashed line through the data represents fit to eqn. (1) in the main text.

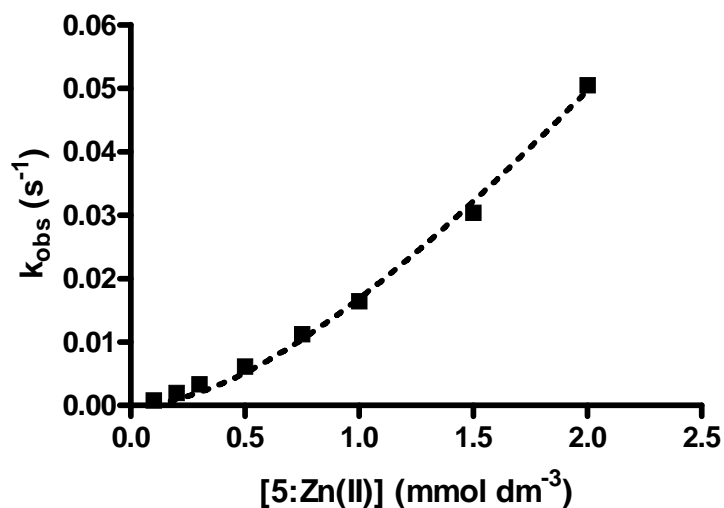

**Figure 24S.** Plot of  $k_{\text{obs}}$  vs.  $[5:\text{Zn(II)}]$  for the catalyzed cleavage of HPNPP (**1**, 0.05 mmol dm<sup>-3</sup>) determined in anhydrous methanol at  $\text{pH} = 11.2$  (triethylamine buffer, 20 mmol dm<sup>-3</sup>) and  $T = 25.0 \pm 0.1$  °C. Data corrected for buffer inhibition as described in the article text. Dashed line through the data represents fit to eqn. (1) in the main text.

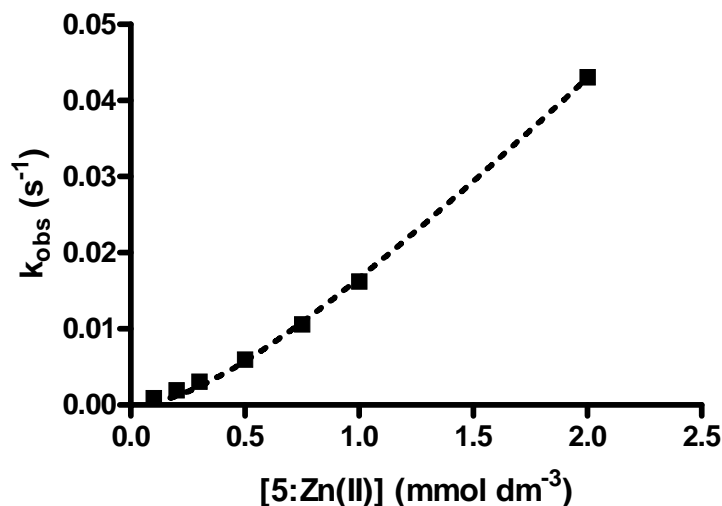

**Figure 25S.** Plot of  $k_{\text{obs}}$  vs.  $[5:\text{Zn(II)}]$  for the catalyzed cleavage of HPNPP (**1**, 0.05 mmol dm<sup>-3</sup>) determined in anhydrous methanol at  $\text{pH} = 12.0$  (2,2,6,6-Tetramethylpiperidine buffer, 20 mmol dm<sup>-3</sup>) and  $T = 25.0 \pm 0.1$  °C. Data corrected for buffer inhibition as described in the article text. Dashed line through the data represents fit to eqn. (1) in the main text.

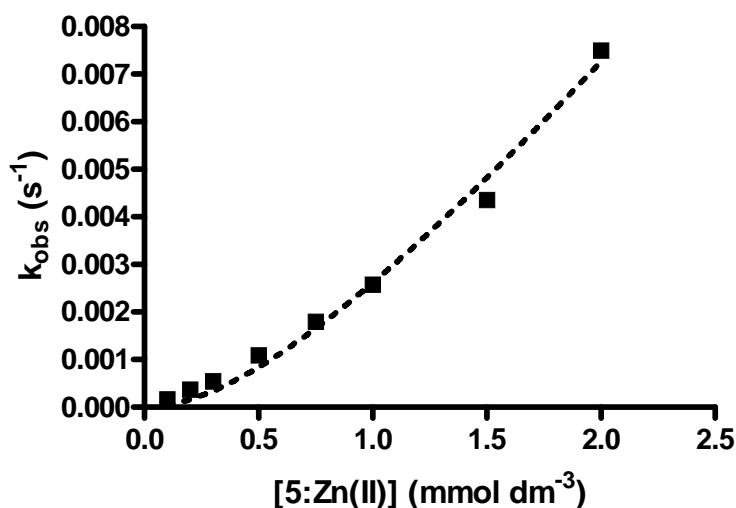

**Figure 26S.** Buffer inhibition plot showing observed pseudo first order rate constants ( $k_{\text{obs}}$ ) vs. [2,6-Lutidine] for the cleavage of HPNPP (**1**,  $0.05 \text{ mmol dm}^{-3}$ ) catalyzed by **5**:Zn(II) ( $1.0 \text{ mmol dm}^{-3}$ ) in 2,6-Lutidine buffer at  $\text{pH} = 7.6$  and  $T = 25.0 \pm 0.1 \text{ }^{\circ}\text{C}$ .

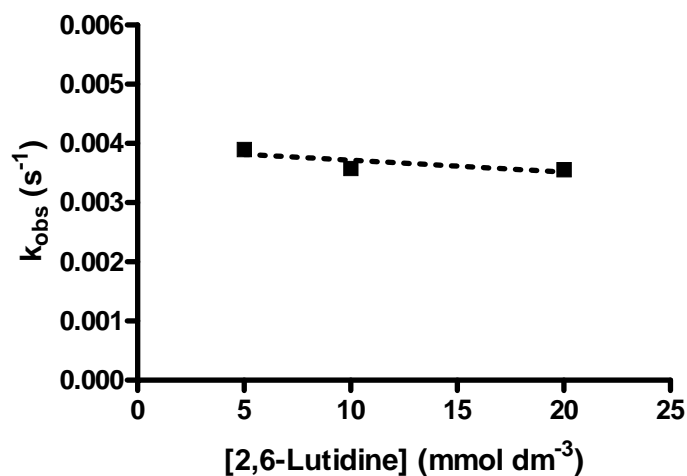

**Figure 27S.** Buffer inhibition plot showing observed pseudo first order rate constants ( $k_{\text{obs}}$ ) vs. [N-ethylmorpholine] for the cleavage of HPNPP (**1**,  $0.05 \text{ mmol dm}^{-3}$ ) catalyzed by **5**:Zn(II) ( $1.0 \text{ mmol dm}^{-3}$ ) in N-ethylmorpholine buffer at  $\text{pH} = 8.3$  and  $T = 25.0 \pm 0.1 \text{ }^{\circ}\text{C}$ .

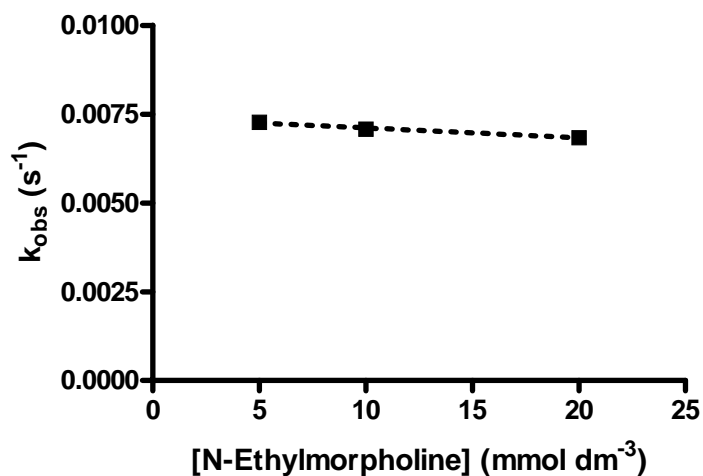

**Figure 28S.** Buffer inhibition plot showing observed pseudo first order rate constants ( $k_{\text{obs}}$ ) vs. [N-ethylmorpholine] for the cleavage of HPNPP (**1**,  $0.05 \text{ mmol dm}^{-3}$ ) catalyzed by **5**:Zn(II) ( $1.0 \text{ mmol dm}^{-3}$ ) in N-ethylmorpholine buffer at  $\text{pH} = 8.6$  and  $T = 25.0 \pm 0.1$  °C.

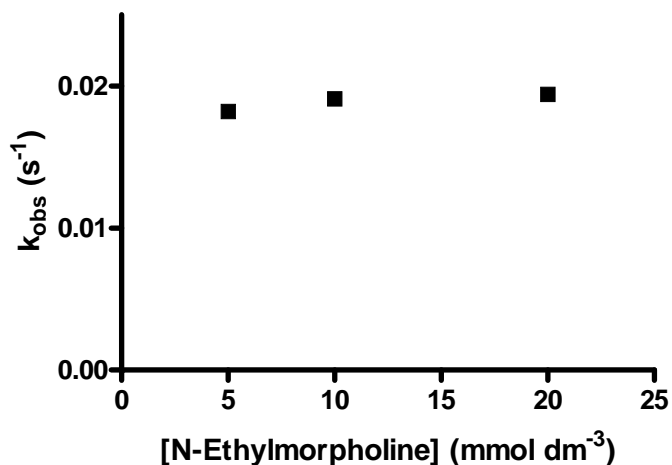

**Figure 29S.** Buffer inhibition plot showing observed pseudo first order rate constants ( $k_{\text{obs}}$ ) vs. [N-ethylmorpholine] for the cleavage of HPNPP (**1**,  $0.05 \text{ mmol dm}^{-3}$ ) catalyzed by **5**:Zn(II) ( $1.0 \text{ mmol dm}^{-3}$ ) in N-ethylmorpholine buffer at  $\text{pH} = 8.9$  and  $T = 25.0 \pm 0.1$  °C.

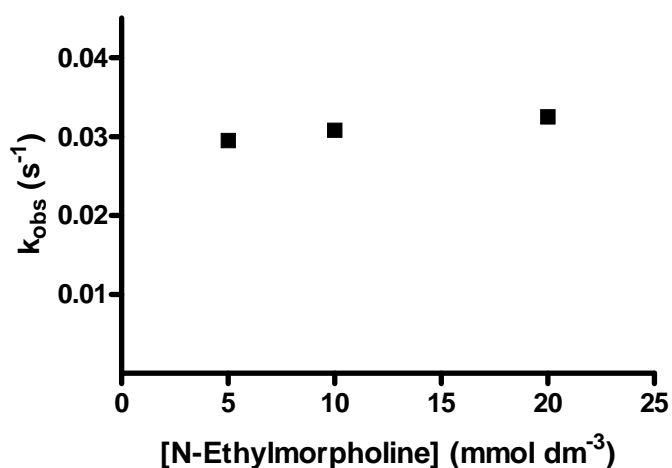

**Figure 30S.** Buffer inhibition plot showing observed pseudo first order rate constants ( $k_{\text{obs}}$ ) vs. [N-methylpiperidine] for the cleavage of HPNPP (**1**,  $0.05 \text{ mmol dm}^{-3}$ ) catalyzed by **5**:Zn(II) ( $1.0 \text{ mmol dm}^{-3}$ ) in N-methylpiperidine buffer at  $\text{pH} = 9.9$  and  $T = 25.0 \pm 0.1$  °C.

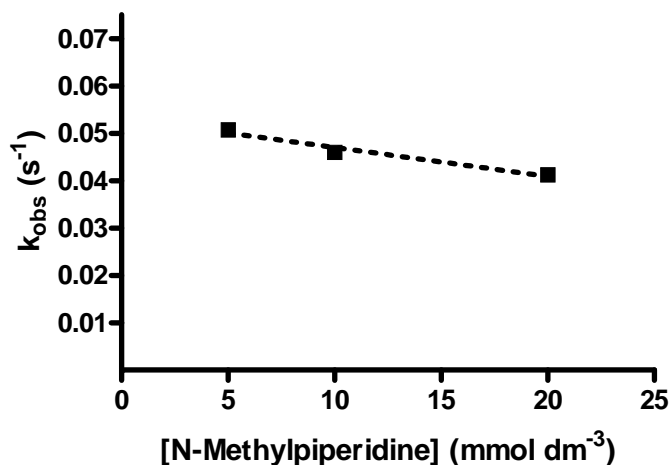

**Figure 31S.** Buffer inhibition plot showing observed pseudo first order rate constants ( $k_{\text{obs}}$ ) vs. [triethylamine] for the cleavage of HPNPP (**1**,  $0.05 \text{ mmol dm}^{-3}$ ) catalyzed by **5**:Zn(II) ( $1.0 \text{ mmol dm}^{-3}$ ) in Triethylamine buffer at  $\text{pH} = 10.4$  and  $T = 25.0 \pm 0.1$  °C.

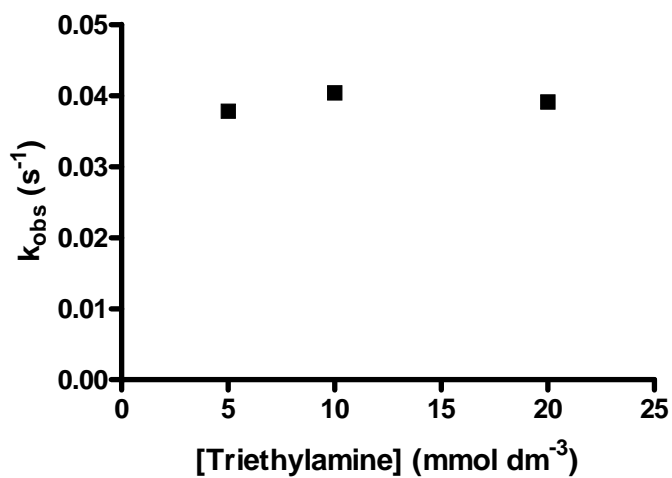

**Figure 32S.** Buffer inhibition plot showing observed pseudo first order rate constants ( $k_{\text{obs}}$ ) vs. [triethylamine] for the cleavage of HPNPP (**1**,  $0.05 \text{ mmol dm}^{-3}$ ) catalyzed by **5**:Zn(II) ( $1.0 \text{ mmol dm}^{-3}$ ) in triethylamine buffer at  $^{\text{s}}\text{pH} = 10.9$  and  $T = 25.0 \pm 0.1 \text{ }^{\circ}\text{C}$ .

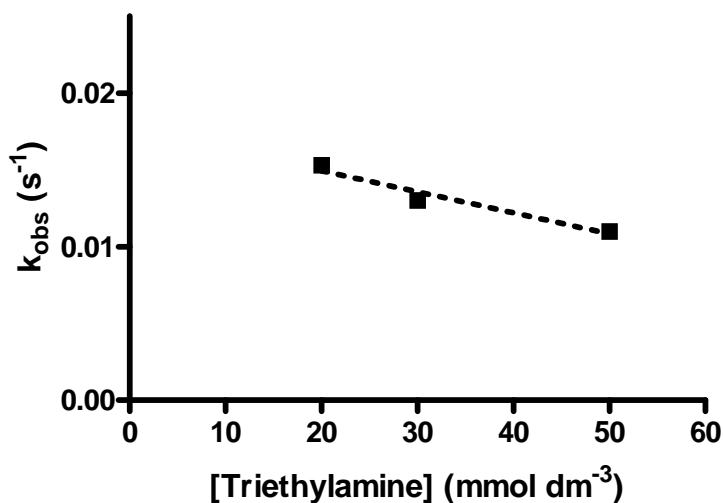

**Figure 33S.** Buffer inhibition plot showing observed pseudo first order rate constants ( $k_{\text{obs}}$ ) vs. [triethylamine] for the cleavage of HPNPP (**1**,  $0.05 \text{ mmol dm}^{-3}$ ) catalyzed by **5**:Zn(II) ( $1.0 \text{ mmol dm}^{-3}$ ) in triethylamine buffer at  $^{\text{s}}\text{pH} = 11.2$  and  $T = 25.0 \pm 0.1 \text{ }^{\circ}\text{C}$ .

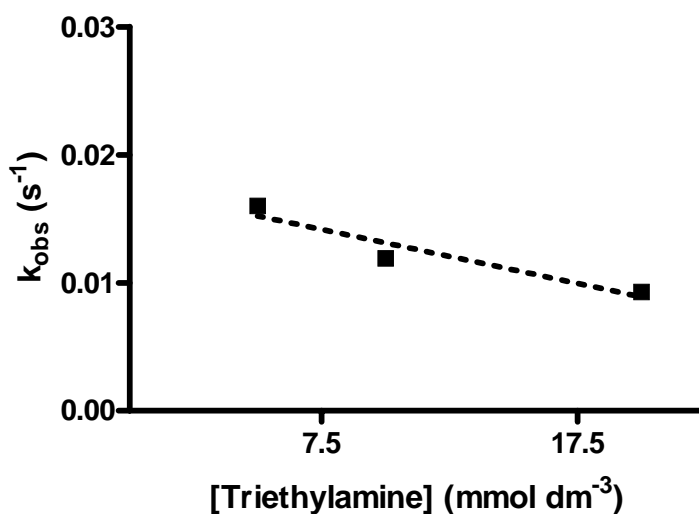

**Figure 34S.** Buffer inhibition plot showing observed pseudo first order rate constants ( $k_{\text{obs}}$ ) vs. [2,2,6,6-tetramethylpiperidine] for the cleavage of HPNPP (**1**,  $0.05 \text{ mmol dm}^{-3}$ ) catalyzed by **5**:Zn(II) ( $1.0 \text{ mmol dm}^{-3}$ ) in 2,2,6,6-tetramethylpiperidine buffer at  $\text{pH} = 12.0$  and  $T = 25.0 \pm 0.1 \text{ }^{\circ}\text{C}$ .

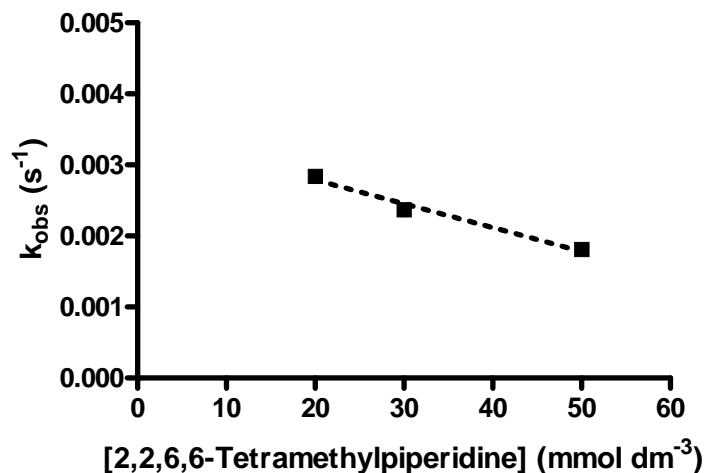

**Figure 35S.** Plot of ( $k_{\text{obs}}$ ) vs. [DBP] for the inhibition of the cleavage of **6** ( $0.05 \text{ mmol dm}^{-3}$ ) catalyzed by **5**:Zn(II) ( $1.0 \text{ mmol dm}^{-3}$ ) by DBP, sodium salt. Determined in anhydrous methanol at  $\text{pH} = 10.2$  and  $T = 25.0 \pm 0.1 \text{ }^{\circ}\text{C}$ . Dashed line through the data points represents the fit to eqn. (S1).

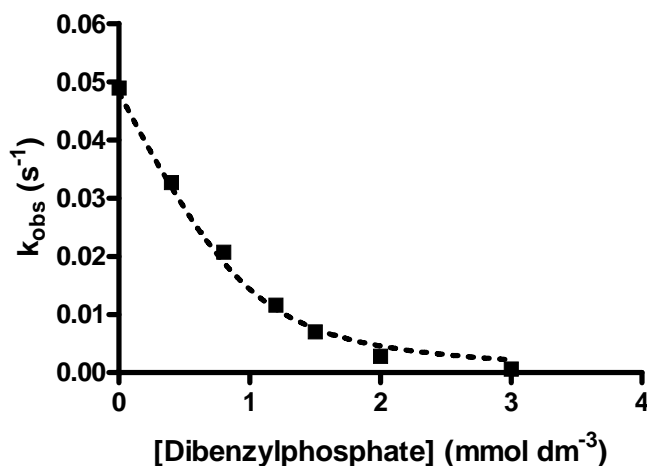

**Figure 36S.** Plot of  $\log k_1^{\text{cat}}$  vs  $^s\text{pH}$  for the cyclization of **1** ( $5.0 \times 10^{-4} \text{ mol dm}^{-3}$ ) catalyzed by **5**:Zn(II) ( $5.0 \times 10^{-5} \text{ mol dm}^{-3}$ ) in buffered methanol at  $T = 25.0 \pm 0.1 \text{ }^\circ\text{C}$ . Dashed line through the data represents fit to eqn. (3) in the main text which gave values of  $^s\text{pK}_a^1 = 9.6 \pm 0.1$ ,  $^s\text{pK}_a^2 = 11.5 \pm 0.2$ , and  $k_1^{\text{max}} = 0.0020 \pm 0.0003 \text{ s}^{-1}$ .

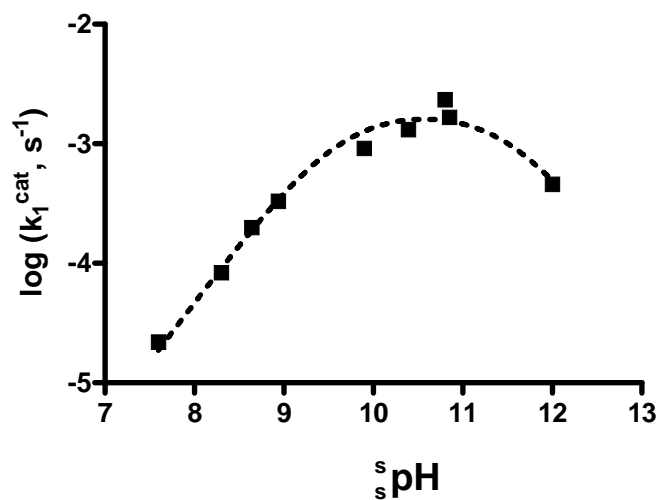

**Figure 37S.** Spectrophotometric titration of **4** ( $1.0 \times 10^{-4} \text{ mol dm}^{-3}$ ) with  $\text{Zn}(\text{OTf})_2$  in methanol buffered at  $^s\text{pH} = 9.1$  and  $T = 25.0 \pm 0.1 \text{ }^\circ\text{C}$ .

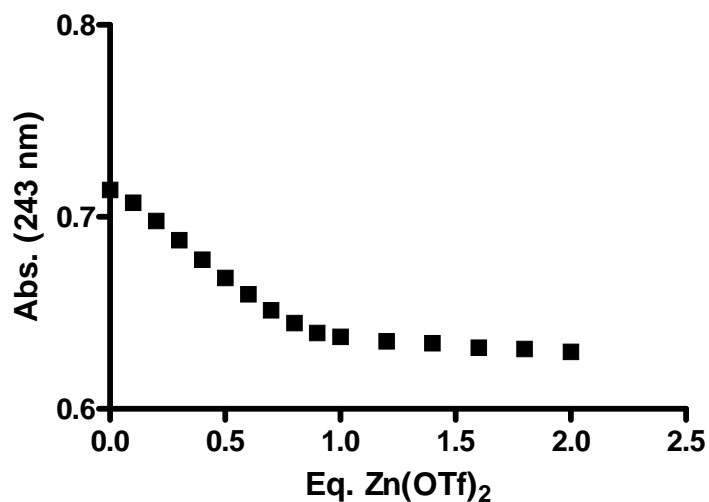

**Figure 38S.** Spectrophotometric titration of **5** ( $1.0 \times 10^{-4} \text{ mol dm}^{-3}$ ) with  $\text{Zn}(\text{OTf})_2$  in methanol buffered at  $^s\text{pH} = 10.0$  and  $T = 25.0 \pm 0.1 \text{ }^\circ\text{C}$ .

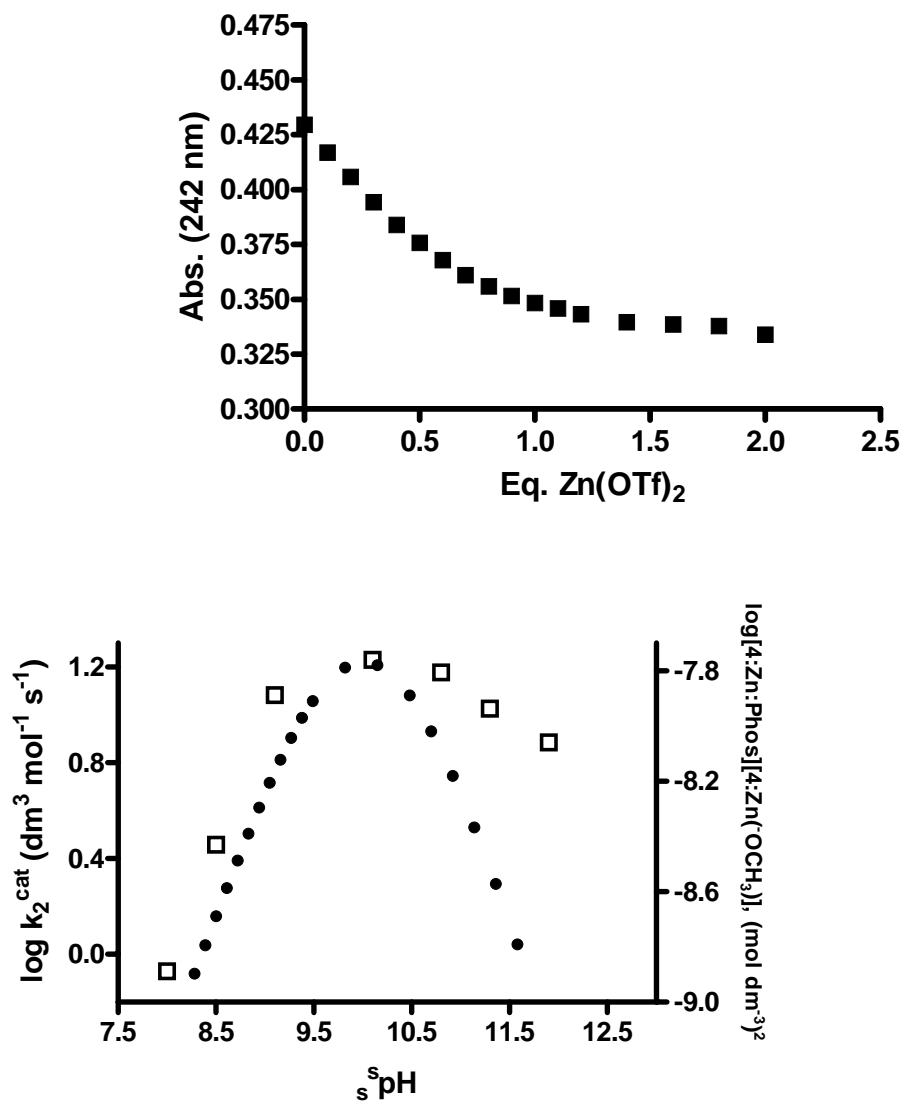

**Figure 39S.** Plot of  $\log k_2^{\text{cat}}$  vs.  $^s\text{pH}$  for the cleavage of HPNPP (**1**) ( $5 \times 10^{-5} \text{ mol dm}^{-3}$ ) by  $[\text{4:Zn}(\text{II})]$  ( $\square$ ). Data superimposed on the figure as ( $\bullet$ ) are computed  $\log [\text{4:Zn:6}][\text{4:Zn}(\text{OCH}_3)]$  in accordance with the bimolecular reaction pathway given in Scheme 1 (main text) at  $25 \text{ }^\circ\text{C}$ .

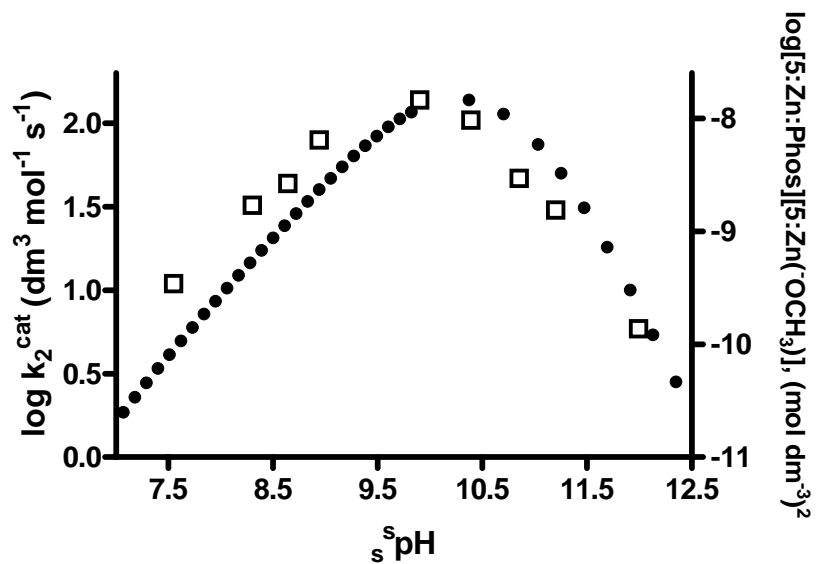

**Figure 40S.** Plot of  $\log k_2^{\text{cat}}$  vs.  $^s\text{pH}$  for the cleavage of HPNPP (**1**) ( $5 \times 10^{-5} \text{ mol dm}^{-3}$ ) by  $[5:\text{Zn}(\text{II})]$  (□). Data superimposed on the figure as (●) are  $\log [5:\text{Zn:6}]/[5:\text{Zn}(\text{OCH}_3)]$  in accordance with the bimolecular reaction pathway given in Scheme 1 (main text) at 25 °C.
